# Supplementary material for: Bioactivities of Steroids and Sesquiterpenes from the Branches and Leaves of Aglaia lawii
Source: MDPI journal article supplement (doi:10.3390/molecules29010039), 2023-12-20
Supplement: s1 [file s1]

# Bioactivities of steroids and sesquiterpenes from the branches and leaves of *Aglaia lawii*

Jing-Jing Dong<sup>3</sup>, Han-Fei Liu<sup>1,2</sup>, Huan Wang<sup>1</sup>, Hua-Yong Lou<sup>1,2,\*</sup>, Wei-Dong Pan<sup>3,\*</sup>, Jin-Yu Li<sup>1,2,\*</sup>

<sup>1</sup> State Key Laboratory of Functions and Applications of Medicinal Plants, Guizhou Medical University, Guiyang 550014, PR China

<sup>2</sup> Natural Products Research Center of Guizhou Province, Guiyang 550014, PR China

<sup>3</sup> School of Pharmaceutical Sciences, Guizhou University, Guiyang 550025, PR China; 2840427380@qq.com

\* Correspondence: lijinyu20080@126.com (J.-Y. Li), wdpan@163.com (W.-D. Pan), louhy@126.com (H.-Y. Lou).

## Tables of Contents

|                    |                                                                                              |    |
|--------------------|----------------------------------------------------------------------------------------------|----|
| <b>Table S1</b>    | ECD analysis parameters of <b>1–6</b> .....                                                  | 4  |
| <b>Table S2</b>    | Important thermodynamic parameters for <b>1–6</b> at B3LYP/6-31G(d) level of theory.....     | 4  |
| <b>Table S3</b>    | Crystal data and structure refinement for compound <b>1</b> .....                            | 5  |
| <b>Figure S1.</b>  | <sup>1</sup> H NMR spectrum of compound <b>1</b> in CDCl <sub>3</sub> (600 MHz).....         | 6  |
| <b>Figure S2.</b>  | <sup>13</sup> C NMR spectrum of compound <b>1</b> in CDCl <sub>3</sub> (150 MHz).....        | 6  |
| <b>Figure S3.</b>  | HSQC spectrum of compound <b>1</b> in CDCl <sub>3</sub> .....                                | 7  |
| <b>Figure S4.</b>  | HMBC spectrum of compound <b>1</b> in CDCl <sub>3</sub> .....                                | 7  |
| <b>Figure S5.</b>  | <sup>1</sup> H- <sup>1</sup> H COSY spectrum of compound <b>1</b> in CDCl <sub>3</sub> ..... | 8  |
| <b>Figure S6.</b>  | NOESY spectrum of compound <b>1</b> in CDCl <sub>3</sub> .....                               | 8  |
| <b>Figure S7.</b>  | HRESIMS spectrum of compound <b>1</b> .....                                                  | 9  |
| <b>Figure S8.</b>  | IR spectrum of compound <b>1</b> .....                                                       | 9  |
| <b>Figure S9.</b>  | UV spectrum of compound <b>1</b> .....                                                       | 10 |
| <b>Figure S10.</b> | CD spectrum of compound <b>1</b> .....                                                       | 10 |
| <b>Figure S11.</b> | <sup>1</sup> H NMR spectrum of compound <b>2</b> in CDCl <sub>3</sub> (600 MHz).....         | 11 |
| <b>Figure S12.</b> | <sup>13</sup> C NMR spectrum of compound <b>2</b> in CDCl <sub>3</sub> (150 MHz).....        | 11 |
| <b>Figure S13.</b> | HSQC spectrum of compound <b>2</b> in CDCl <sub>3</sub> .....                                | 12 |
| <b>Figure S14.</b> | HMBC spectrum of compound <b>2</b> in CDCl <sub>3</sub> .....                                | 12 |
| <b>Figure S15.</b> | <sup>1</sup> H- <sup>1</sup> H COSY spectrum of compound <b>2</b> in CDCl <sub>3</sub> ..... | 13 |
| <b>Figure S16.</b> | NOESY spectrum of compound <b>2</b> in CDCl <sub>3</sub> .....                               | 13 |
| <b>Figure S17.</b> | HRESIMS spectrum of compound <b>2</b> .....                                                  | 14 |
| <b>Figure S18.</b> | IR spectrum of compound <b>2</b> .....                                                       | 14 |
| <b>Figure S19.</b> | UV spectrum of compound <b>2</b> .....                                                       | 15 |
| <b>Figure S20.</b> | CD spectrum of compound <b>2</b> .....                                                       | 15 |
| <b>Figure S21.</b> | <sup>1</sup> H NMR spectrum of compound <b>3</b> in CDCl <sub>3</sub> (600 MHz).....         | 16 |
| <b>Figure S22.</b> | <sup>13</sup> C NMR spectrum of compound <b>3</b> in CDCl <sub>3</sub> (150 MHz).....        | 16 |
| <b>Figure S23.</b> | HSQC spectrum of compound <b>3</b> in CDCl <sub>3</sub> .....                                | 17 |
| <b>Figure S24.</b> | HMBC spectrum of compound <b>3</b> in CDCl <sub>3</sub> .....                                | 17 |
| <b>Figure S25.</b> | <sup>1</sup> H- <sup>1</sup> H COSY spectrum of compound <b>3</b> in CDCl <sub>3</sub> ..... | 18 |
| <b>Figure S26.</b> | NOESY spectrum of compound <b>3</b> in CDCl <sub>3</sub> .....                               | 18 |
| <b>Figure S27.</b> | HRESIMS spectrum of compound <b>3</b> .....                                                  | 19 |
| <b>Figure S28.</b> | IR spectrum of compound <b>3</b> .....                                                       | 19 |
| <b>Figure S29.</b> | UV spectrum of compound <b>3</b> .....                                                       | 20 |
| <b>Figure S30.</b> | CD spectrum of compound <b>3</b> .....                                                       | 20 |
| <b>Figure S31.</b> | <sup>1</sup> H NMR spectrum of compound <b>4</b> in CDCl <sub>3</sub> (600 MHz).....         | 21 |
| <b>Figure S32.</b> | <sup>13</sup> C NMR spectrum of compound <b>4</b> in CDCl <sub>3</sub> (150 MHz).....        | 21 |
| <b>Figure S33.</b> | HSQC spectrum of compound <b>4</b> in CDCl <sub>3</sub> .....                                | 22 |
| <b>Figure S34.</b> | HMBC spectrum of compound <b>4</b> in CDCl <sub>3</sub> .....                                | 22 |
| <b>Figure S35.</b> | <sup>1</sup> H- <sup>1</sup> H COSY spectrum of compound <b>4</b> in CDCl <sub>3</sub> ..... | 23 |
| <b>Figure S36.</b> | NOESY spectrum of compound <b>4</b> in CDCl <sub>3</sub> .....                               | 23 |
| <b>Figure S37.</b> | HRESIMS spectrum of compound <b>4</b> .....                                                  | 24 |
| <b>Figure S38.</b> | IR spectrum of compound <b>4</b> .....                                                       | 24 |

|                    |                                                                                         |    |
|--------------------|-----------------------------------------------------------------------------------------|----|
| <b>Figure S39.</b> | UV spectrum of compound <b>4</b> .....                                                  | 25 |
| <b>Figure S40.</b> | CD spectrum of compound <b>4</b> .....                                                  | 25 |
| <b>Figure S41.</b> | $^1\text{H}$ NMR spectrum of compound <b>5</b> in $\text{CDCl}_3$ (600 MHz).....        | 26 |
| <b>Figure S42.</b> | $^{13}\text{C}$ NMR spectrum of compound <b>5</b> in $\text{CDCl}_3$ (150 MHz).....     | 26 |
| <b>Figure S43.</b> | HSQC spectrum of compound <b>5</b> in $\text{CDCl}_3$ .....                             | 27 |
| <b>Figure S44.</b> | HMBC spectrum of compound <b>5</b> in $\text{CDCl}_3$ .....                             | 27 |
| <b>Figure S45.</b> | $^1\text{H}$ - $^1\text{H}$ COSY spectrum of compound <b>5</b> in $\text{CDCl}_3$ ..... | 28 |
| <b>Figure S46.</b> | NOESY spectrum of compound <b>5</b> in $\text{CDCl}_3$ .....                            | 28 |
| <b>Figure S47.</b> | HRESIMS spectrum of compound <b>5</b> .....                                             | 29 |
| <b>Figure S48.</b> | IR spectrum of compound <b>5</b> .....                                                  | 29 |
| <b>Figure S49.</b> | UV spectrum of compound <b>5</b> .....                                                  | 30 |
| <b>Figure S50.</b> | CD spectrum of compound <b>5</b> .....                                                  | 30 |
| <b>Figure S51.</b> | $^1\text{H}$ NMR spectrum of compound <b>6</b> in $\text{CDCl}_3$ (600 MHz).....        | 31 |
| <b>Figure S52.</b> | $^{13}\text{C}$ NMR spectrum of compound <b>6</b> in $\text{CDCl}_3$ (150 MHz).....     | 31 |
| <b>Figure S53.</b> | HSQC spectrum of compound <b>6</b> in $\text{CDCl}_3$ .....                             | 32 |
| <b>Figure S54.</b> | HMBC spectrum of compound <b>6</b> in $\text{CDCl}_3$ .....                             | 32 |
| <b>Figure S55.</b> | $^1\text{H}$ - $^1\text{H}$ COSY spectrum of compound <b>6</b> in $\text{CDCl}_3$ ..... | 33 |
| <b>Figure S56.</b> | NOESY spectrum of compound <b>6</b> in $\text{CDCl}_3$ .....                            | 33 |
| <b>Figure S57.</b> | IR spectrum of compound <b>6</b> .....                                                  | 34 |
| <b>Figure S58.</b> | HRESIMS spectrum of compound <b>6</b> .....                                             | 34 |
| <b>Figure S59.</b> | UV spectrum of compound <b>6</b> .....                                                  | 35 |
| <b>Figure S60.</b> | CD spectrum of compound <b>6</b> .....                                                  | 35 |
| <b>Figure S61.</b> | Compounds separation flowchart.....                                                     | 36 |

## ECD calculation details of 1–6

**Table S1** ECD analysis parameters of 1–6.

| No.      | half-bandwidth (eV) | UV correction (nm) |
|----------|---------------------|--------------------|
| <b>1</b> | 0.16                | 0                  |
| <b>2</b> | 0.16                | 0                  |
| <b>3</b> | 0.16                | 0                  |
| <b>4</b> | 0.16                | 0                  |
| <b>5</b> | 0.16                | 0                  |
| <b>6</b> | 0.16                | 0                  |

**Table S2** Important thermodynamic parameters for 1–6 at B3LYP/6-31G(d) level of theory.

| NO.      | E <sup>a</sup> (Hartree) | C <sup>b</sup> (Hartree) | G <sup>c</sup> (kcal/mol) |
|----------|--------------------------|--------------------------|---------------------------|
| <b>1</b> | -1197.831564             | 0.484682                 | -751347.141924            |
| <b>2</b> | -1273.563122             | 0.510408                 | -798853.308562            |
| <b>3</b> | -1359.620929             | 0.666449                 | -852757.525745            |
| <b>4</b> | -1433.643746             | 0.647647                 | -898703.503488            |
| <b>5</b> | -1433.631309             | 0.648259                 | -898695.319807            |
| <b>6</b> | -851.037260              | 0.352475                 | -533813.209435            |

a Electronic energy; b Thermal correction to Gibbs free energy obtained; c Gibbs free energy (E + C).

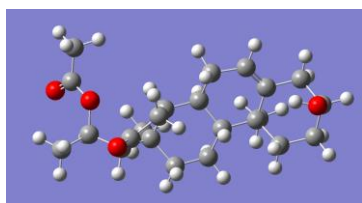

**1**

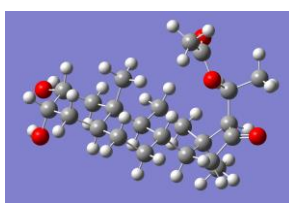

**2**

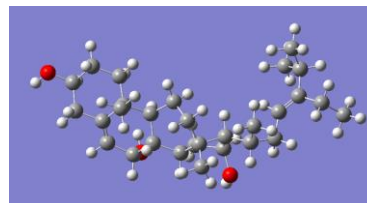

**3**

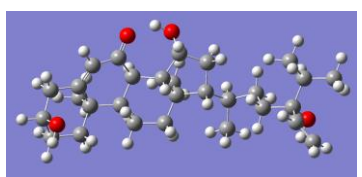

**4**

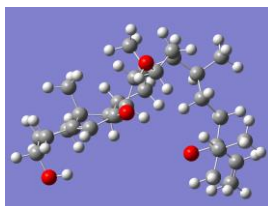

**5**

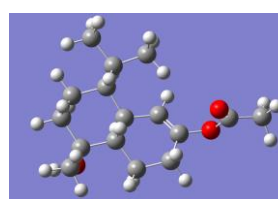

**6**

**Table S3** Crystal data and structure refinement for compound **1**

| Identification code                         | <b>1</b>                                                       |
|---------------------------------------------|----------------------------------------------------------------|
| Empirical formula                           | C <sub>23</sub> H <sub>34</sub> O <sub>4</sub>                 |
| Formula weight                              | 374.50                                                         |
| Temperature/K                               | 99.96 (13)                                                     |
| Crystal system                              | orthorhombic                                                   |
| Space group                                 | P2 <sub>1</sub> 2 <sub>1</sub> 2 <sub>1</sub>                  |
| a/Å                                         | 5.70310(10)                                                    |
| b/Å                                         | 10.8236(2)                                                     |
| c/Å                                         | 33.1051(4)                                                     |
| $\alpha/^\circ$                             | 90                                                             |
| $\beta/^\circ$                              | 90                                                             |
| $\gamma/^\circ$                             | 90                                                             |
| Volume/Å <sup>3</sup>                       | 2043.51(6)                                                     |
| Z                                           | 4                                                              |
| $\rho_{\text{calc}}/\text{g/cm}^3$          | 1.217                                                          |
| $\mu/\text{mm}^{-1}$                        | 0.647                                                          |
| F(000)                                      | 816.0                                                          |
| Crystal size/mm <sup>3</sup>                | 0.6 × 0.06 × 0.04                                              |
| Radiation                                   | Cu K $\alpha$ ( $\lambda$ = 1.54184)                           |
| 2 $\Theta$ range for data collection/       | 5.338 to 148.786                                               |
| Index ranges                                | -6 ≤ h ≤ 6, -12 ≤ k ≤ 13, -40 ≤ l ≤ 41                         |
| Reflections collected                       | 19741                                                          |
| Independent reflections                     | 4094 [ $R_{\text{int}}$ = 0.0454, $R_{\text{sigma}}$ = 0.0289] |
| Data/restraints/parameters                  | 4094/0/249                                                     |
| Goodness-of-fit on F <sup>2</sup>           | 1.044                                                          |
| Final R indexes [ $I \geq 2\sigma(I)$ ]     | $R_1$ = 0.0328, $wR_2$ = 0.0838                                |
| Final R indexes [all data]                  | $R_1$ = 0.0347, $wR_2$ = 0.0850                                |
| Largest diff. peak/hole / e Å <sup>-3</sup> | 0.23/-0.23                                                     |
| Flack parameter                             | 0.05(8)                                                        |

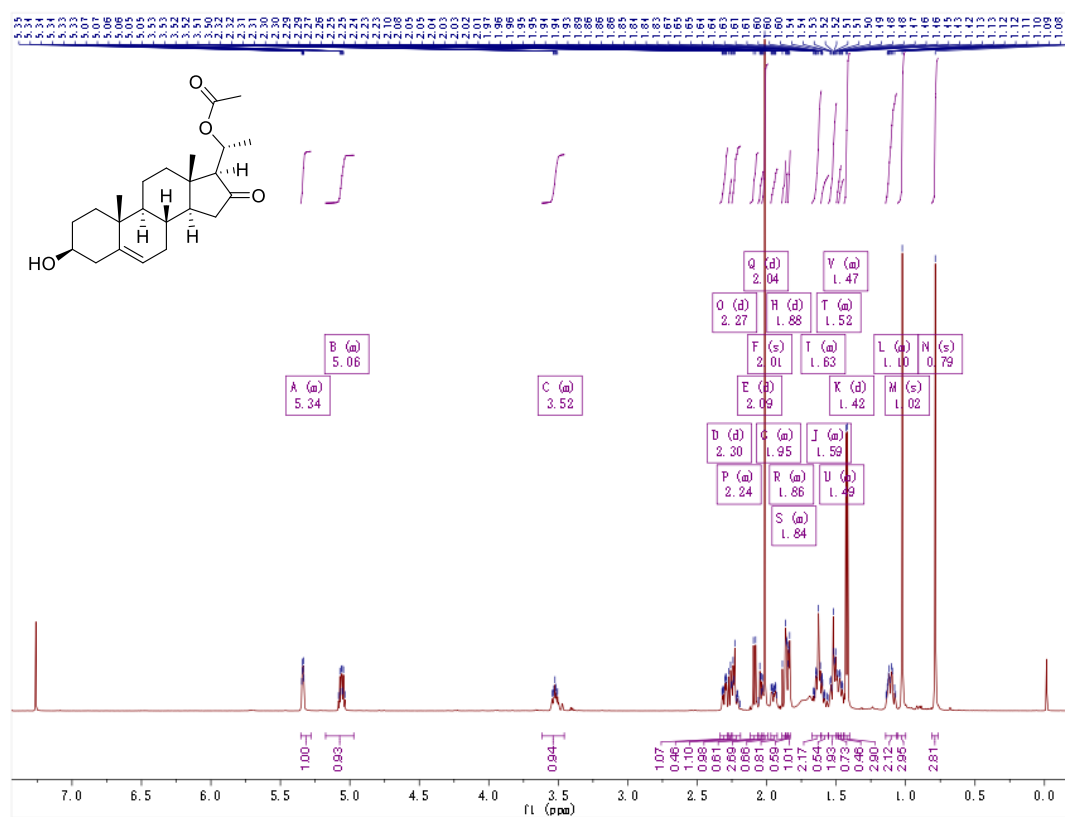

**Figure S1.**  $^1\text{H}$  NMR spectrum of compound **1** in  $\text{CDCl}_3$  (600 MHz)

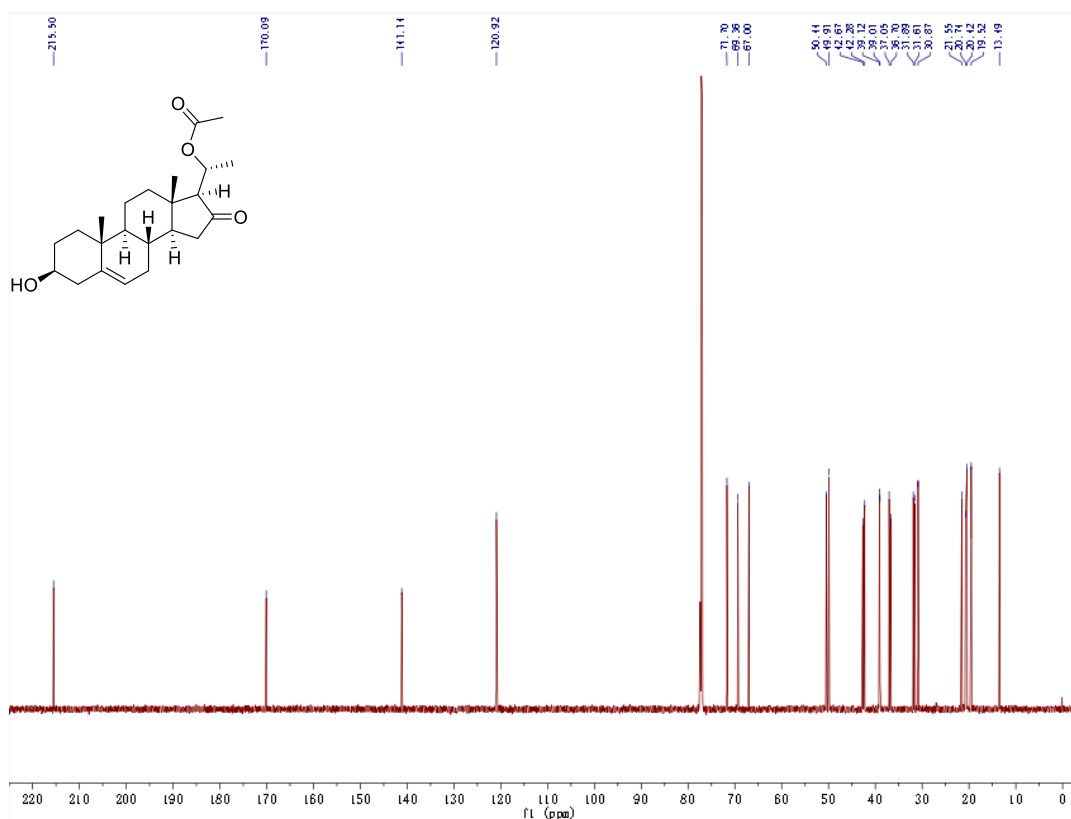

**Figure S2.**  $^{13}\text{C}$  NMR spectrum of compound **1** in  $\text{CDCl}_3$  (150 MHz)

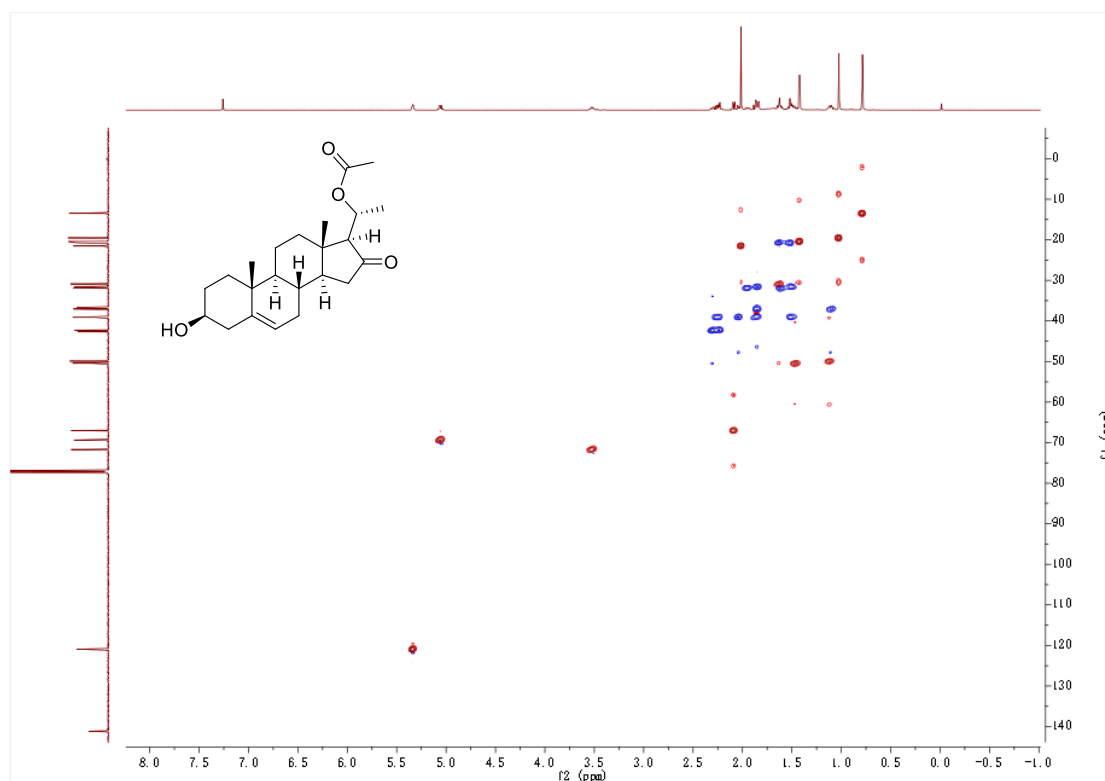

**Figure S3.** HSQC spectrum of compound **1** in  $\text{CDCl}_3$

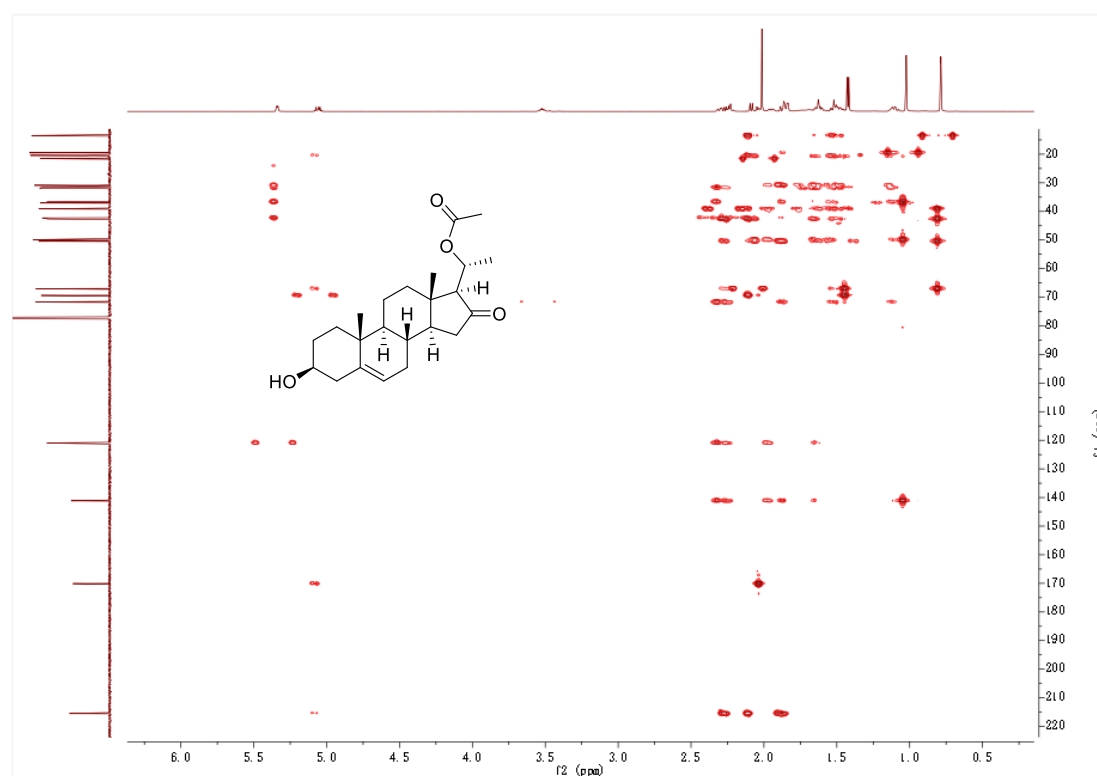

**Figure S4.** HMBC spectrum of compound **1** in  $\text{CDCl}_3$

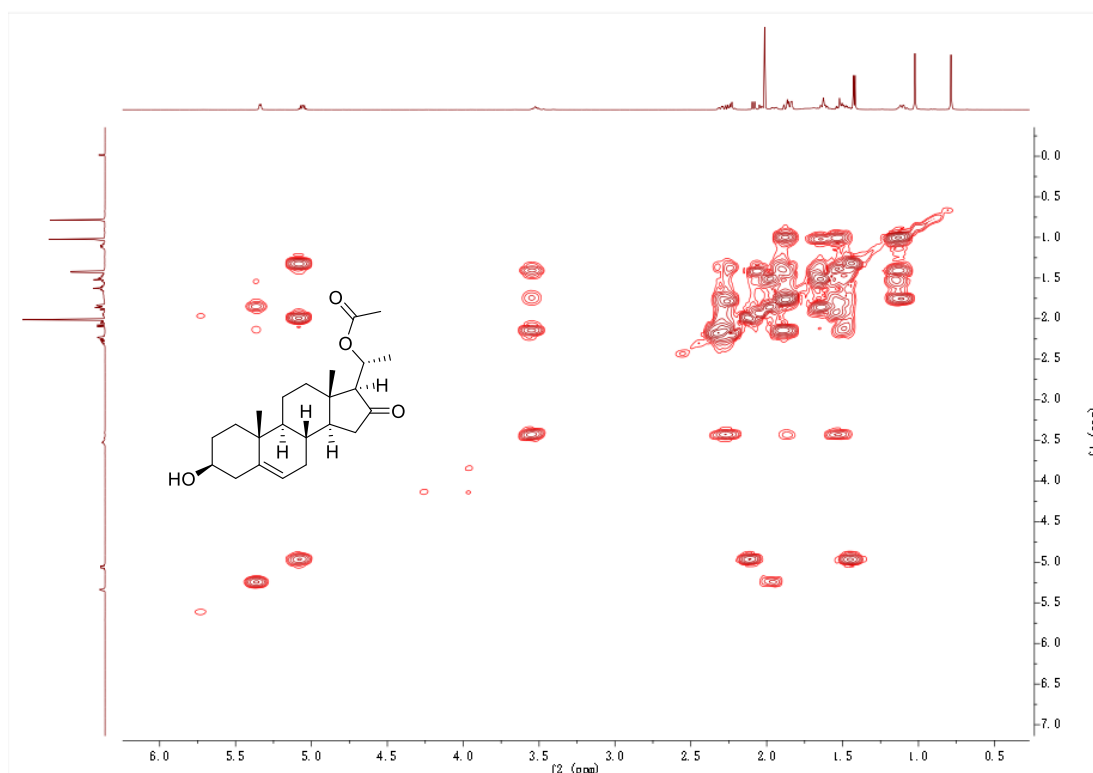

**Figure S5.**  $^1\text{H}$ - $^1\text{H}$  COSY spectrum of compound **1** in  $\text{CDCl}_3$

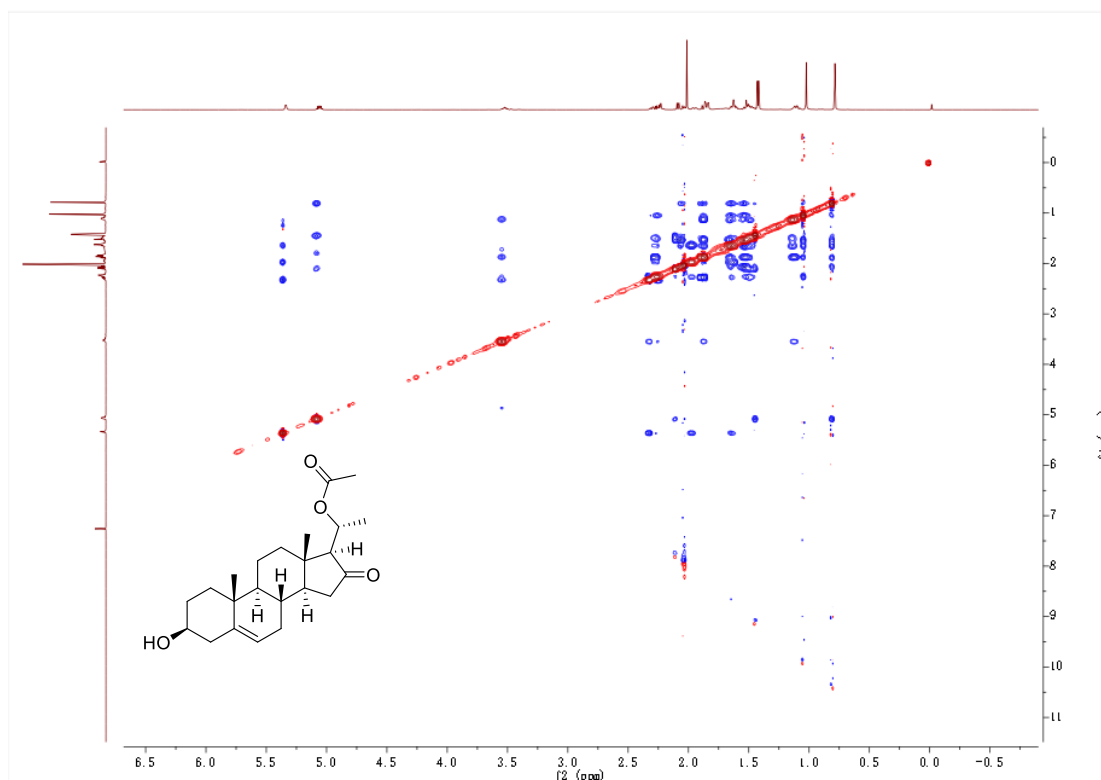

**Figure S6.** NOESY spectrum of compound **1** in  $\text{CDCl}_3$



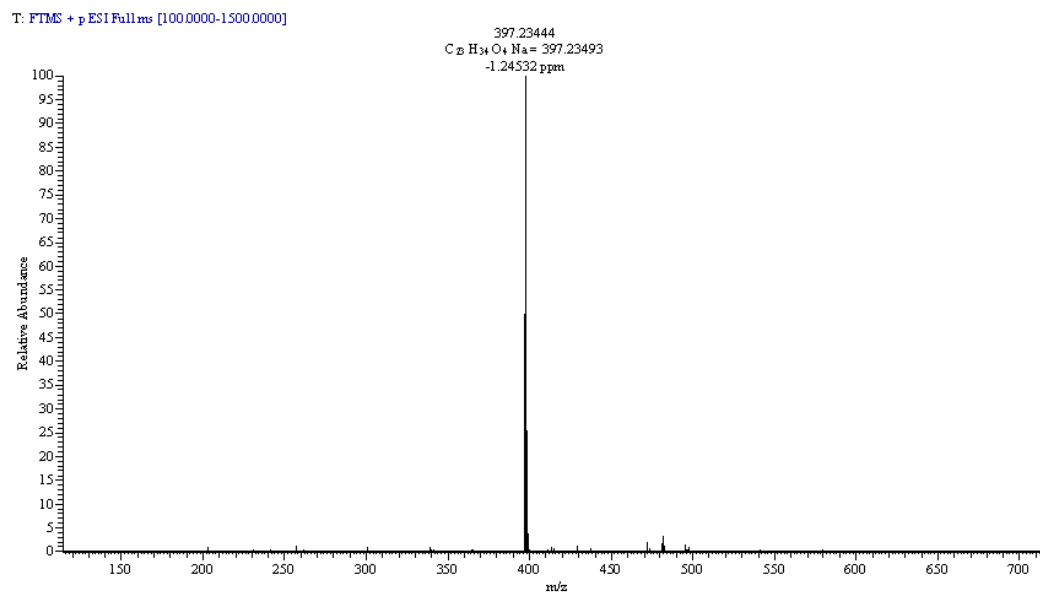

**Figure S7.** HRESIMS spectrum of compound **1**

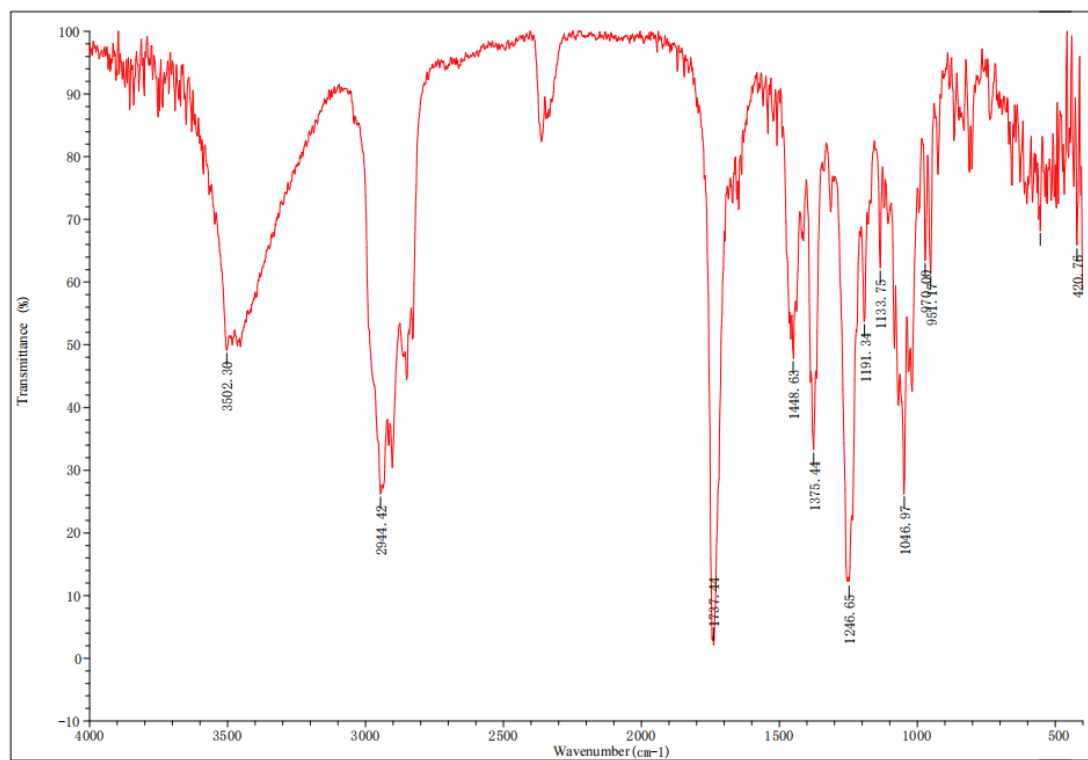

**Figure S8.** IR spectrum of compound **1**

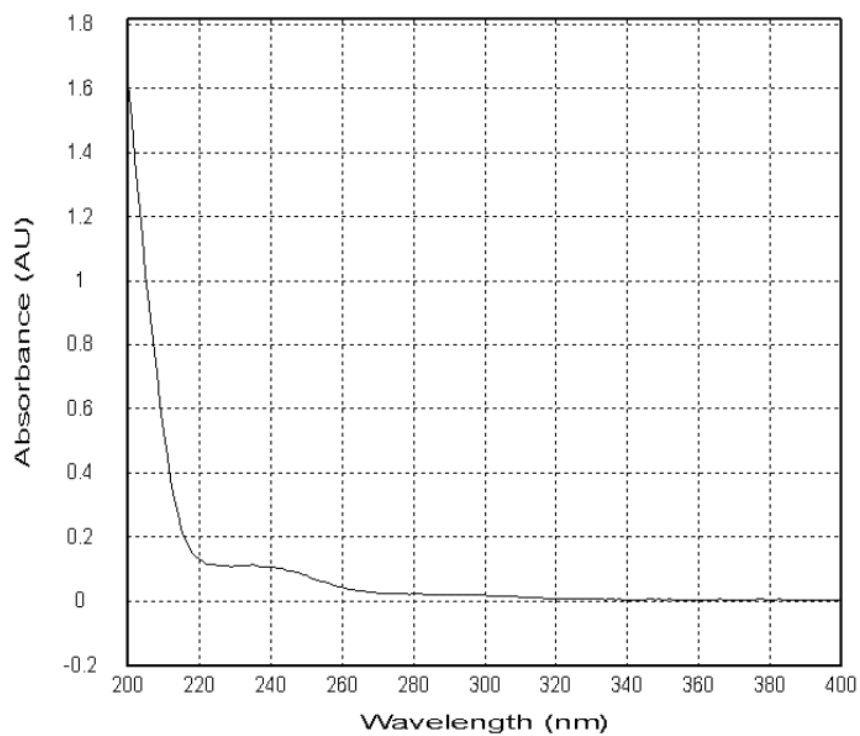

**Figure S9.** UV spectrum of compound **1**

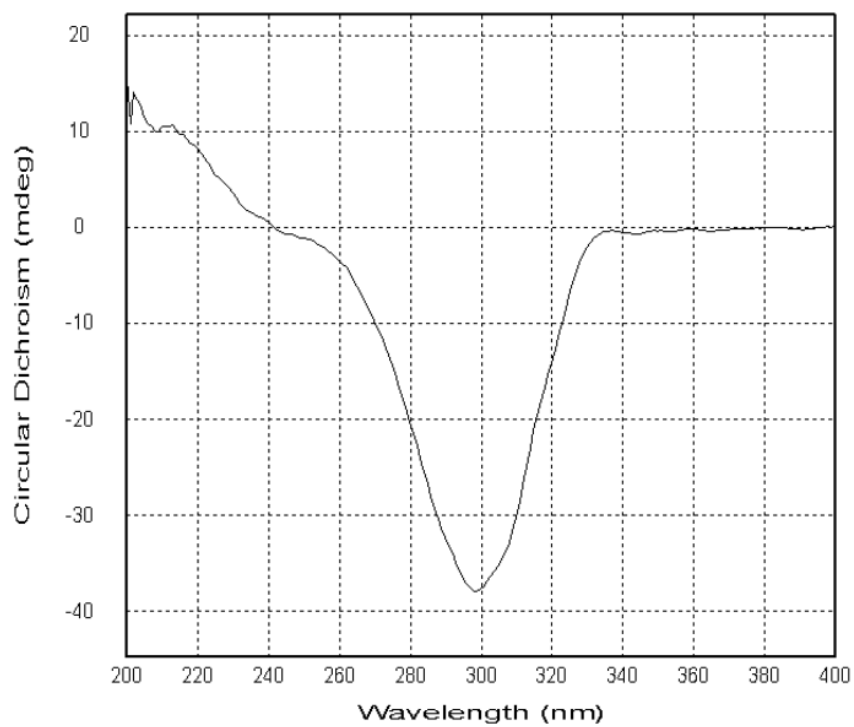

**Figure S10.** CD spectrum of compound **1**

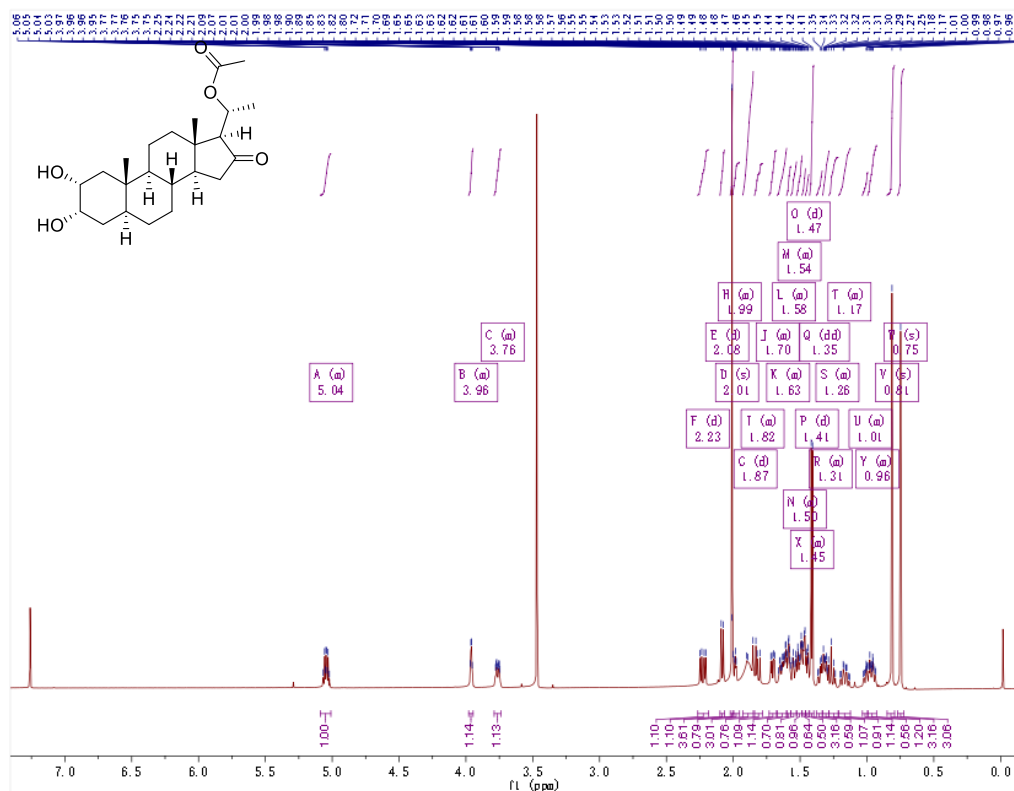

**Figure S11.** <sup>1</sup>H NMR spectrum of compound **2** in CDCl<sub>3</sub> (600 MHz)

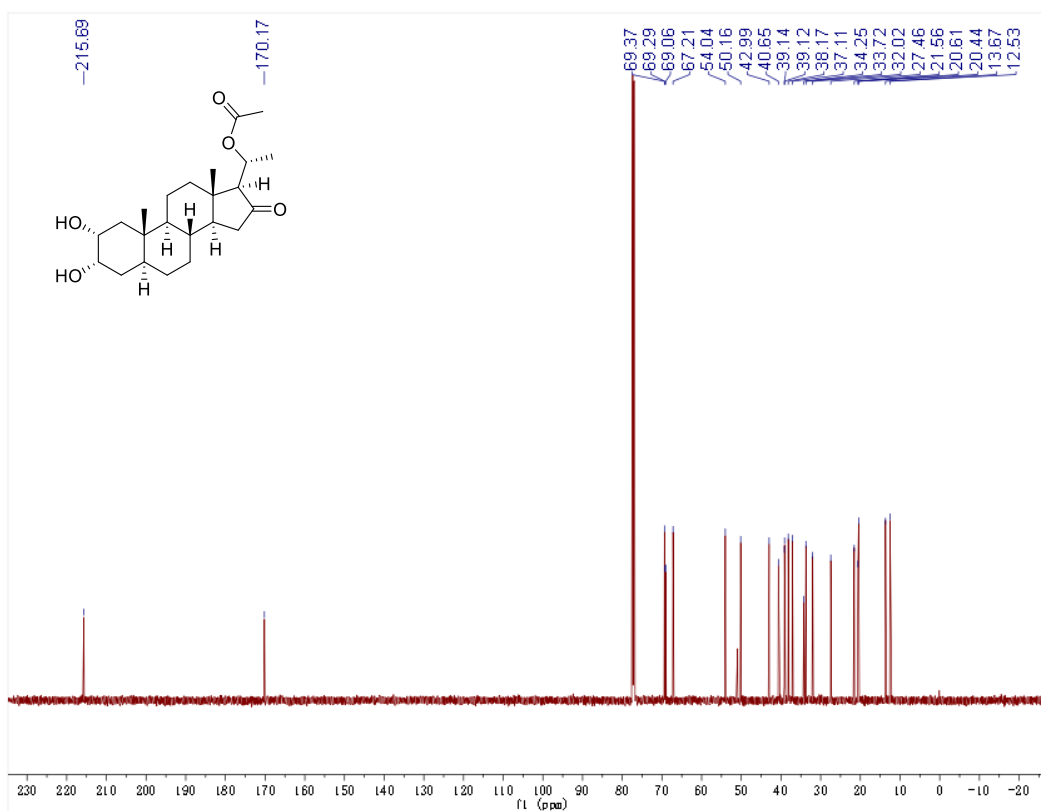

**Figure S12.** <sup>13</sup>C NMR spectrum of compound **2** in CDCl<sub>3</sub> (150 MHz)

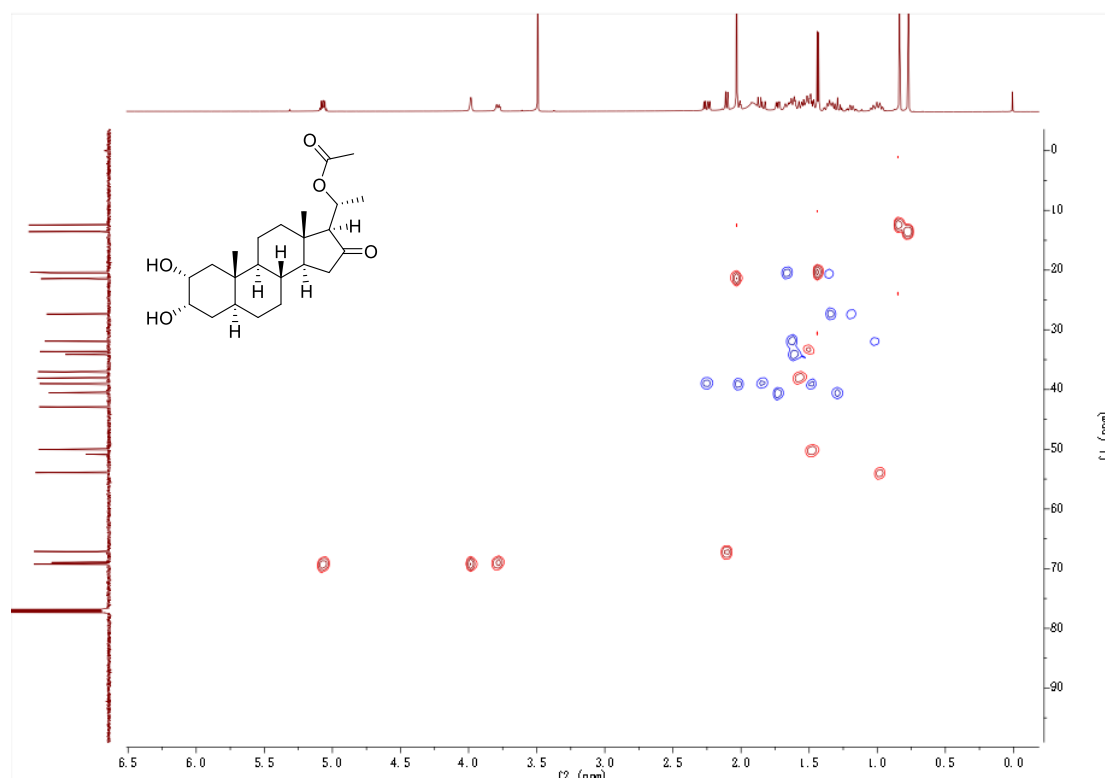

**Figure S13.** HSQC spectrum of compound **2** in  $\text{CDCl}_3$

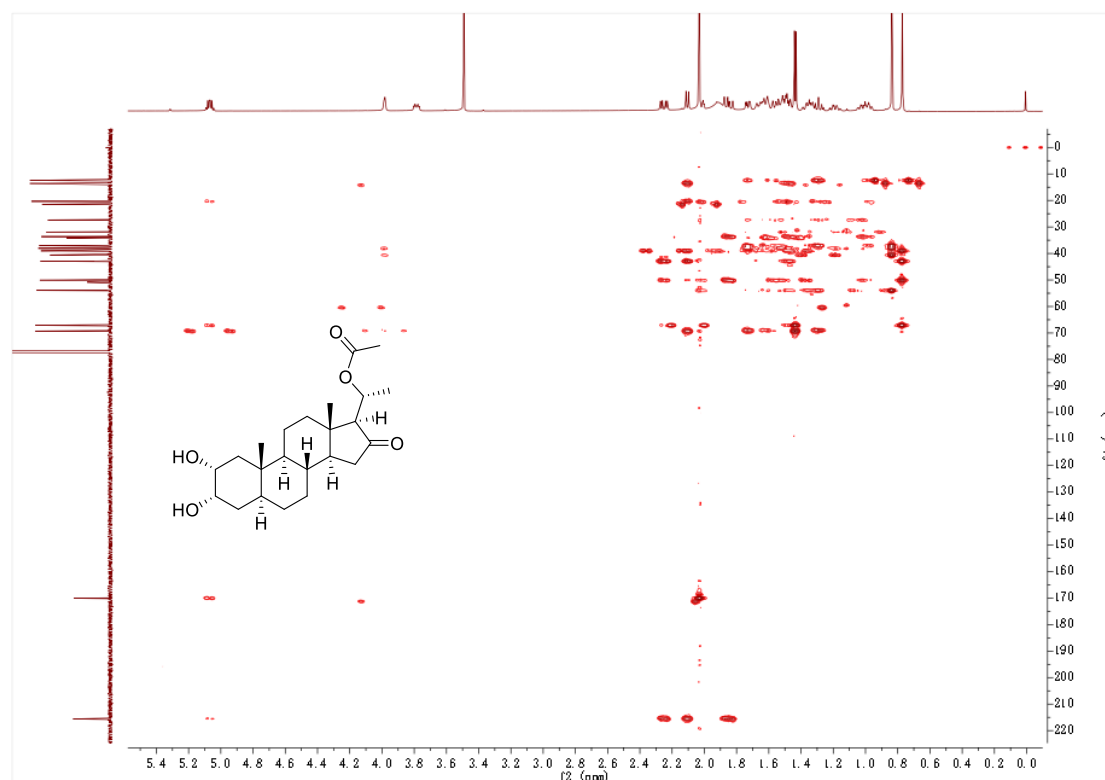

**Figure S14.** HMBC spectrum of compound **2** in  $\text{CDCl}_3$

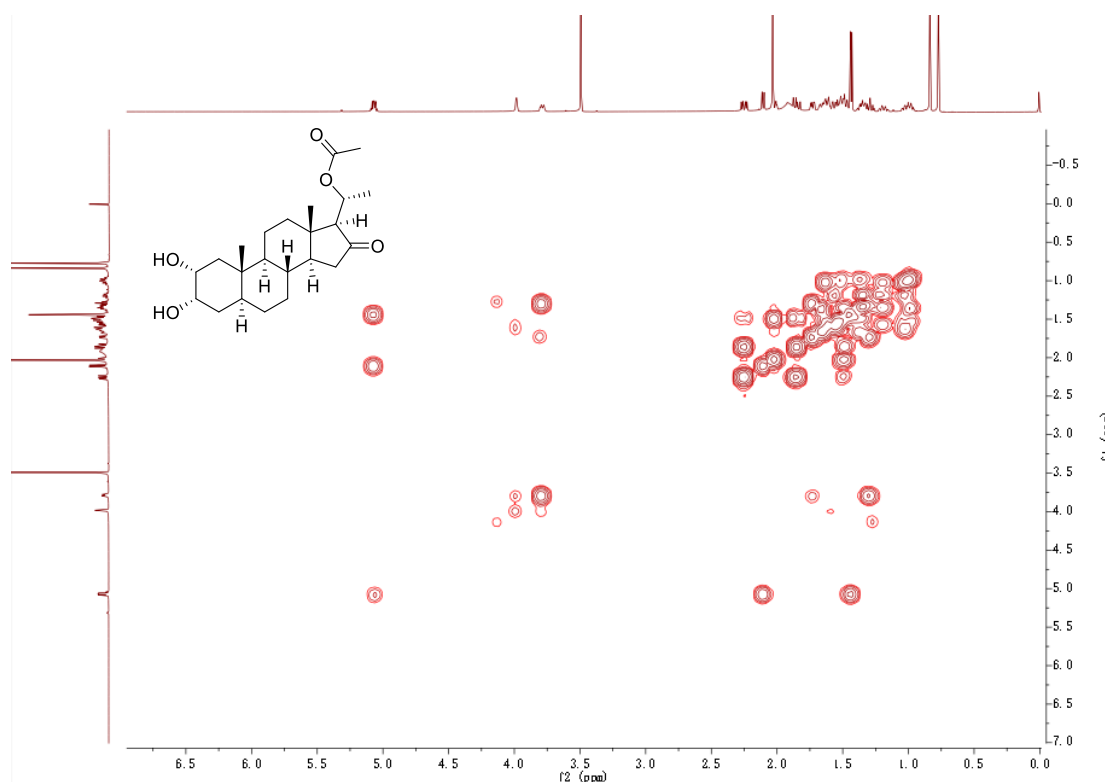

**Figure S15.**  $^1\text{H}$ - $^1\text{H}$  COSY spectrum of compound **2** in  $\text{CDCl}_3$

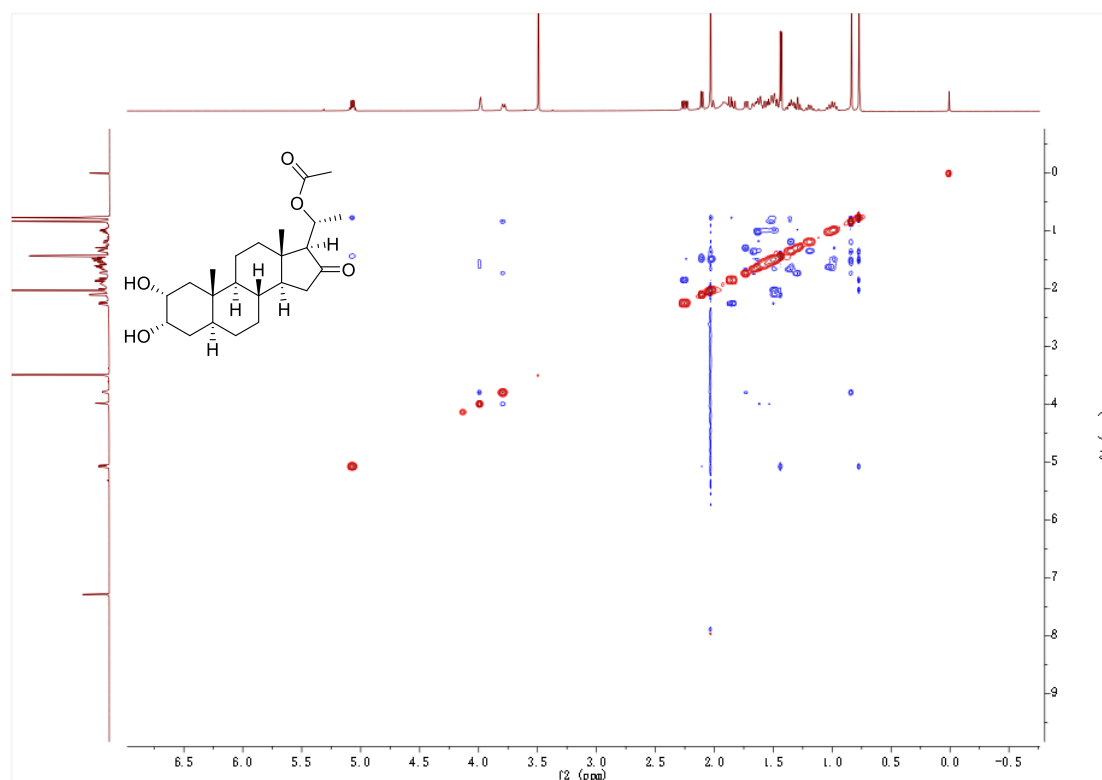

**Figure S16.** NOESY spectrum of compound **2** in  $\text{CDCl}_3$

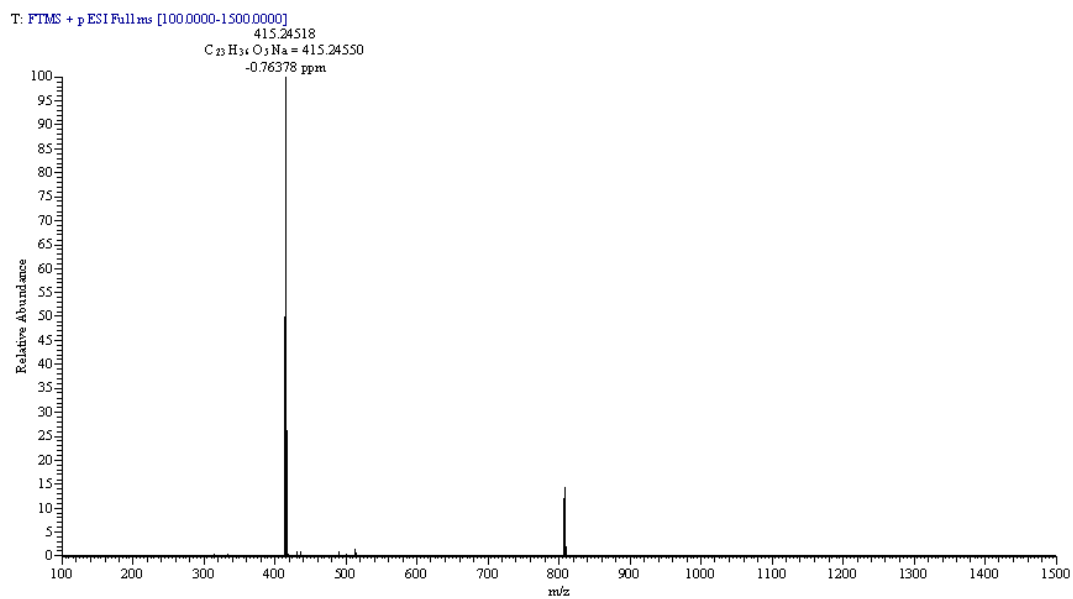

**Figure S17.** HRESIMS spectrum of compound **2**

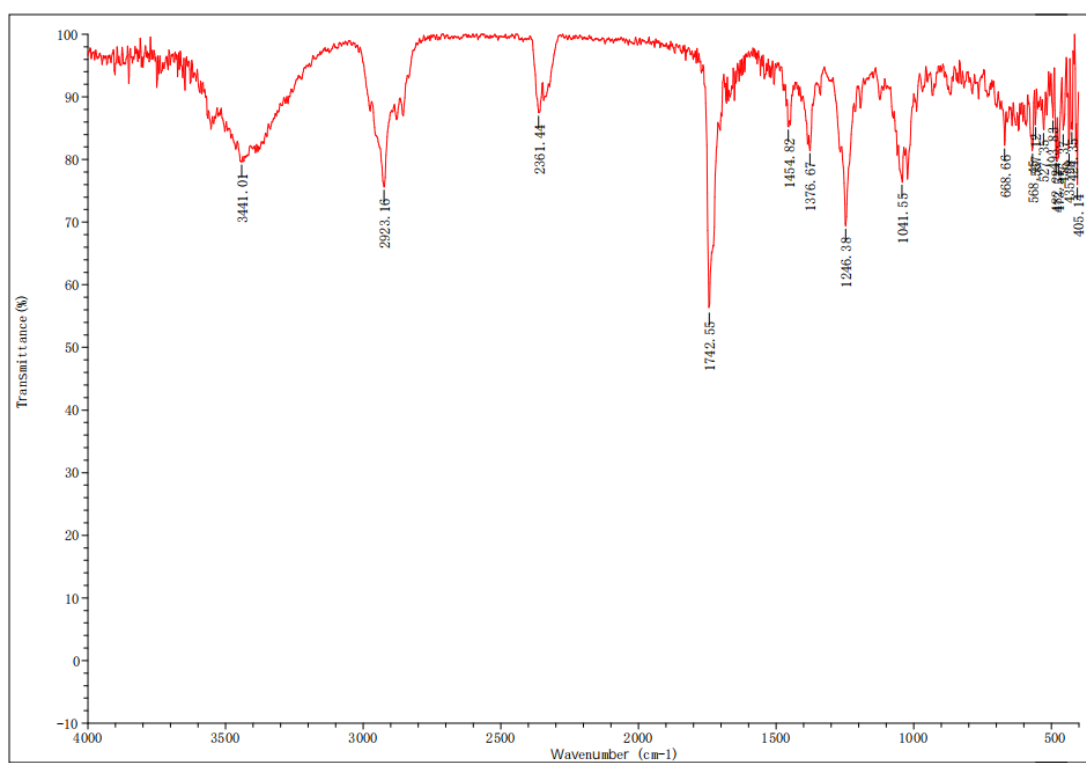

**Figure S18.** IR spectrum of compound **2**

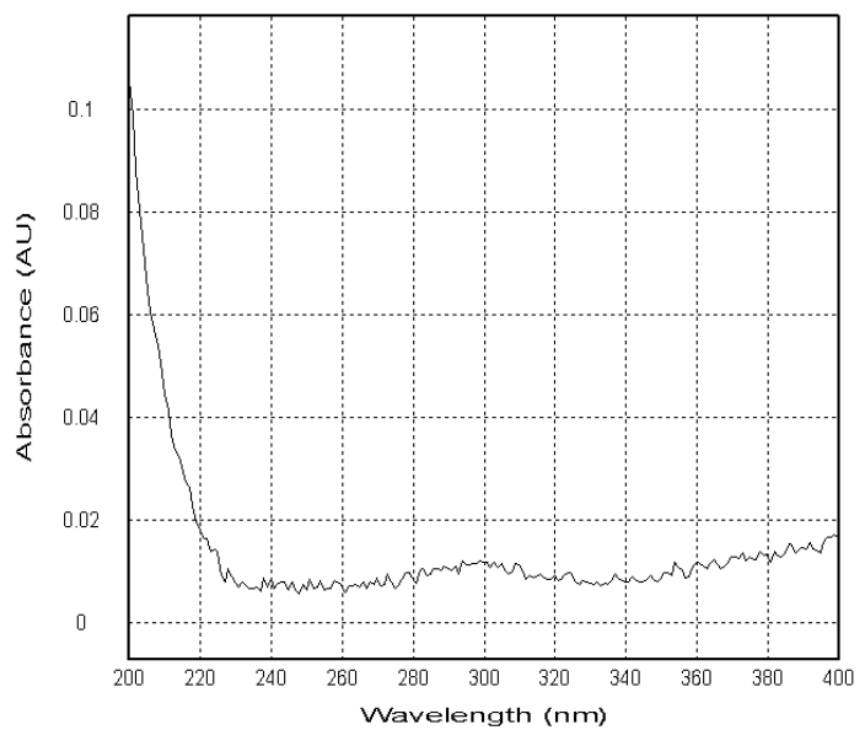

**Figure S19.** UV spectrum of compound **2**

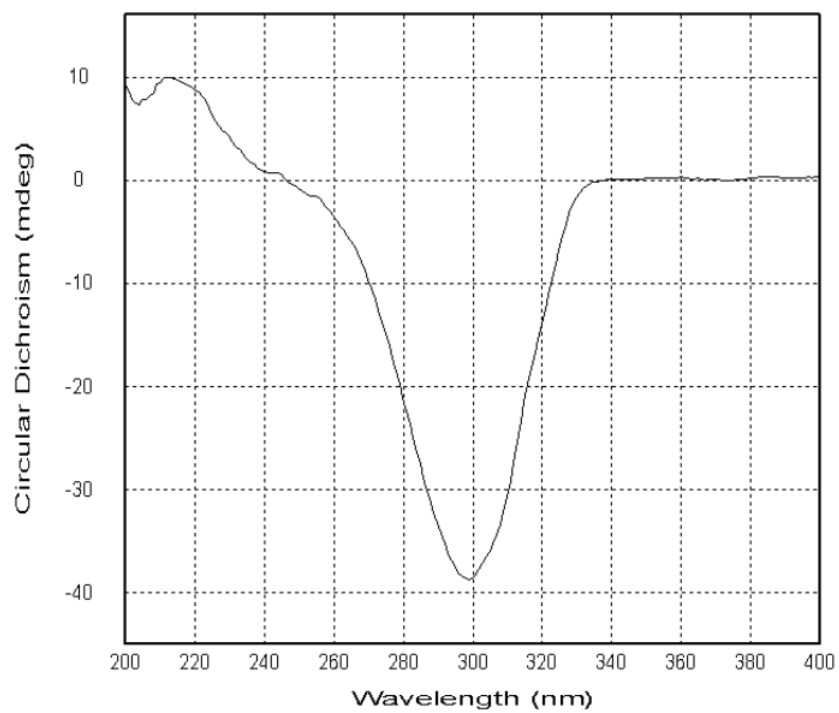

**Figure S20.** CD spectrum of compound **2**

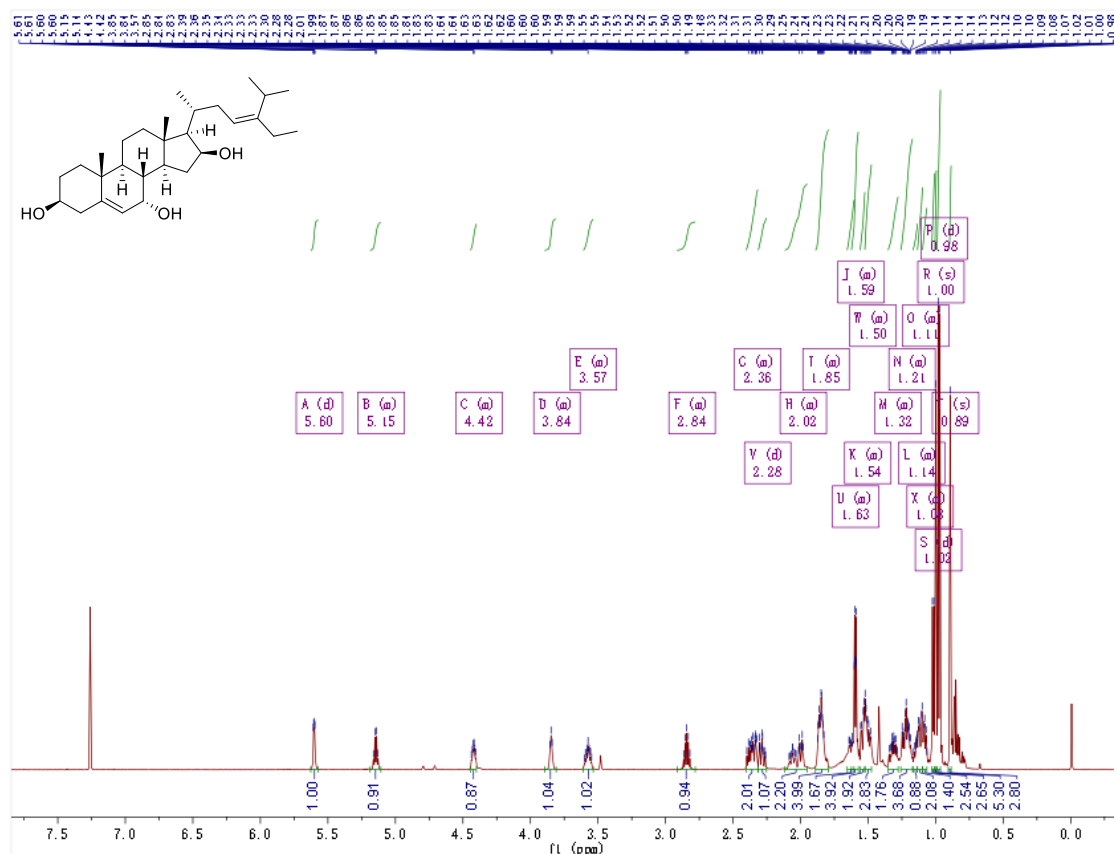

**Figure S21.**  $^1\text{H}$  NMR spectrum of compound **3** in  $\text{CDCl}_3$  (600 MHz)

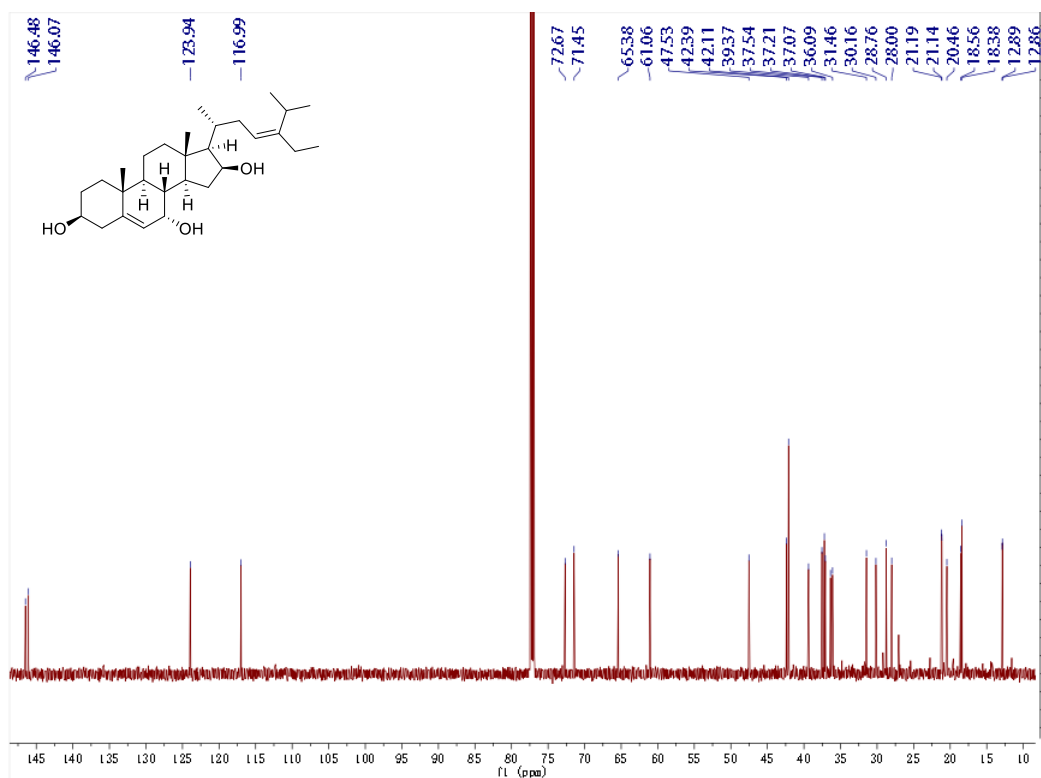

**Figure S22.**  $^{13}\text{C}$  NMR spectrum of compound **3** in  $\text{CDCl}_3$  (150 MHz)



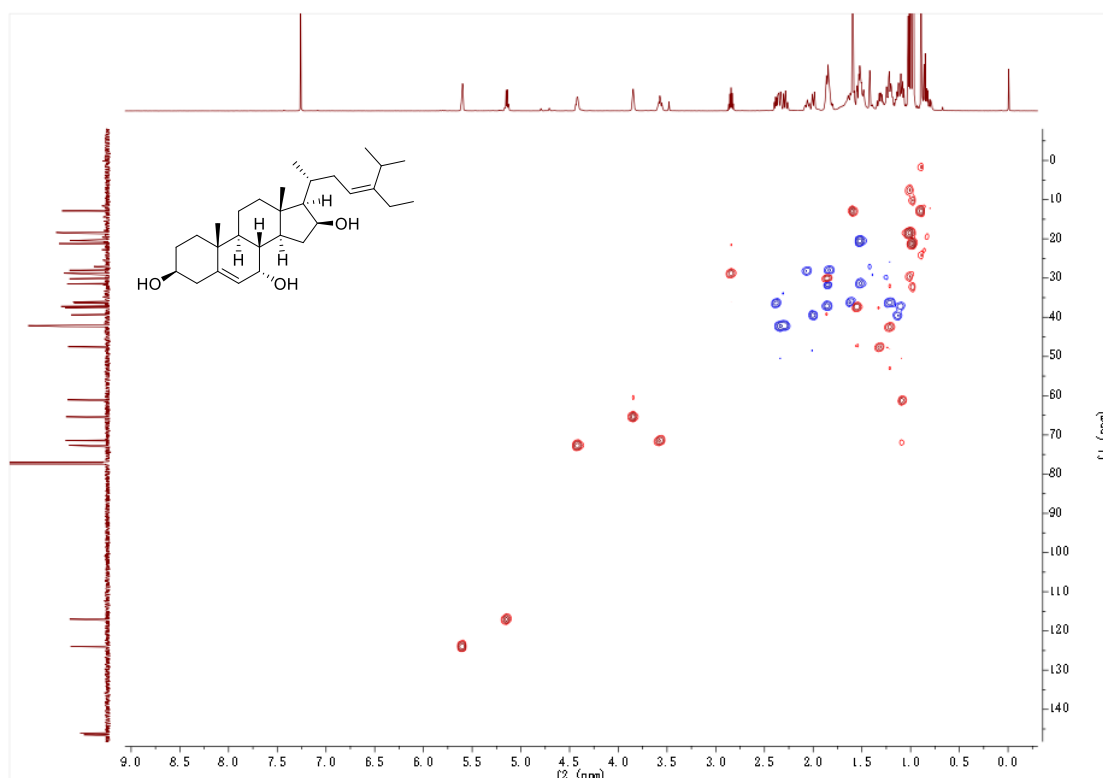

**Figure S23.** HSQC spectrum of compound **3** in  $\text{CDCl}_3$

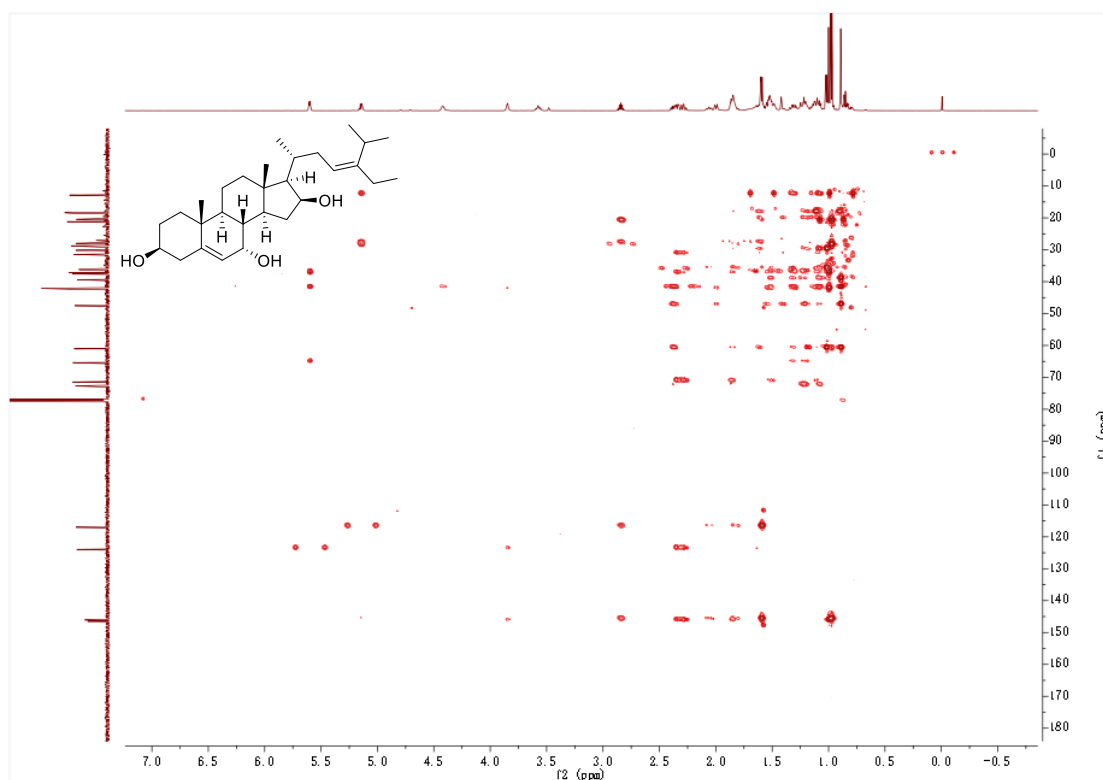

**Figure S24.** HMBC spectrum of compound **3** in  $\text{CDCl}_3$

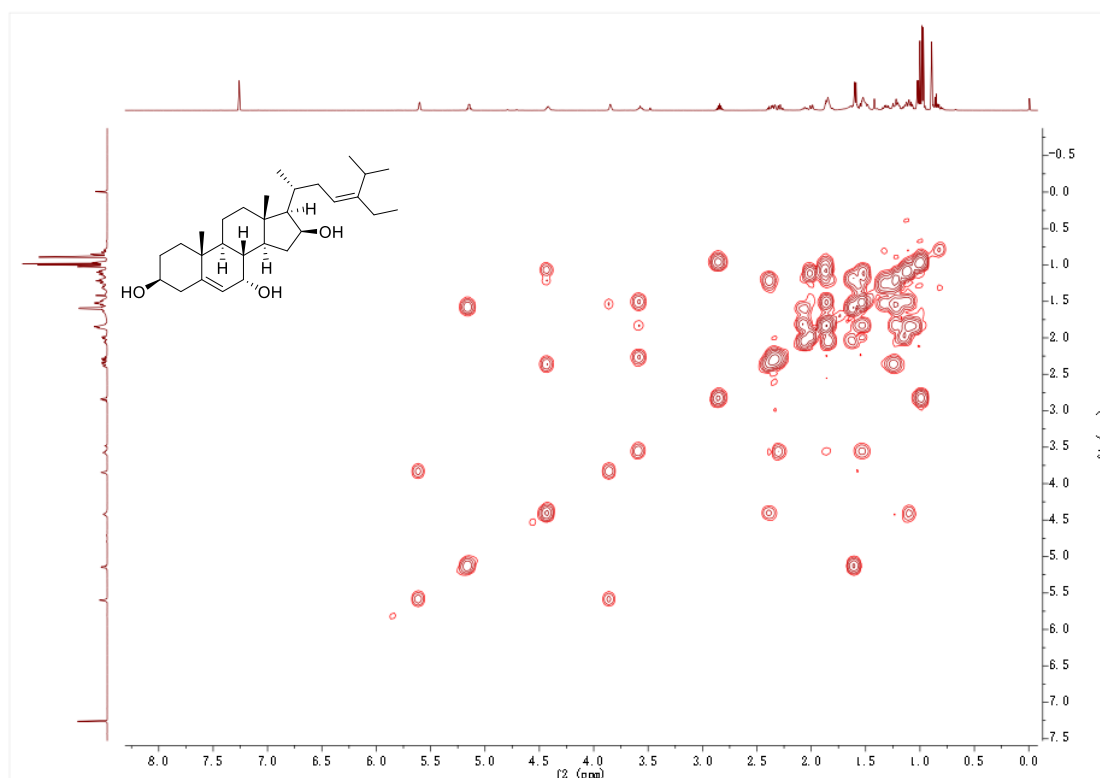

**Figure S25.**  $^1\text{H}$ - $^1\text{H}$  COSY spectrum of compound **3** in  $\text{CDCl}_3$

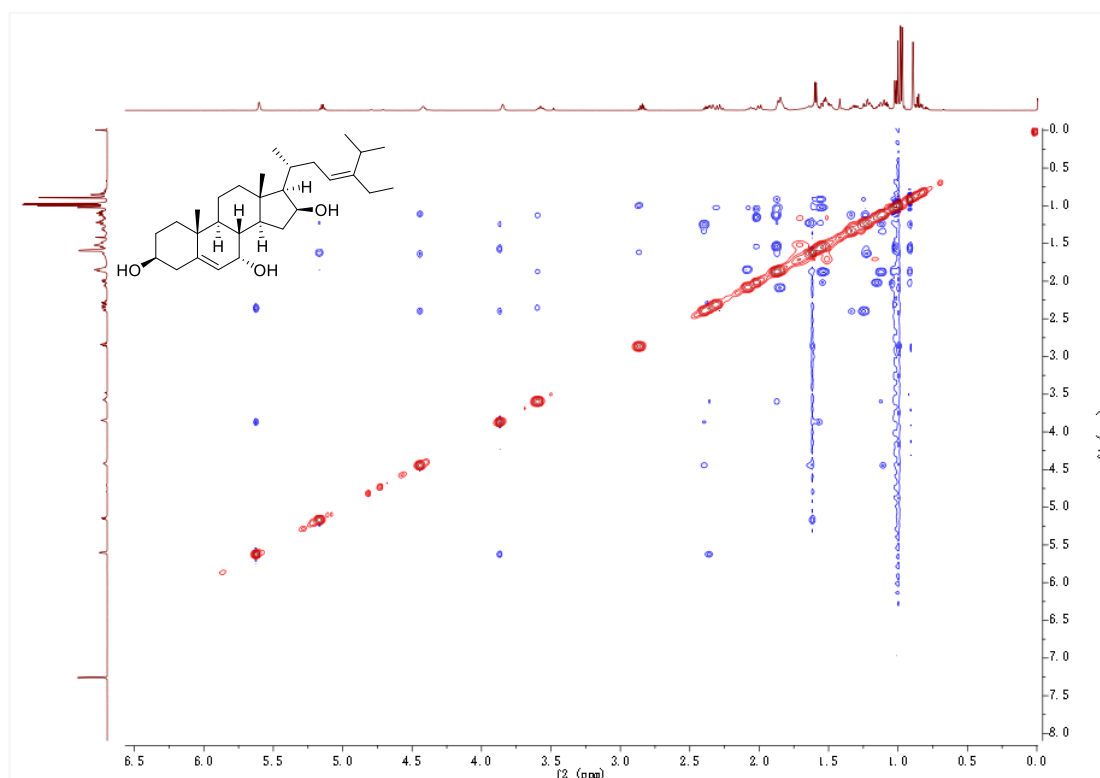

**Figure S26.** NOESY spectrum of compound **3** in  $\text{CDCl}_3$

T: FTMS + p ES1 Full ms [100.0000-1500.0000]

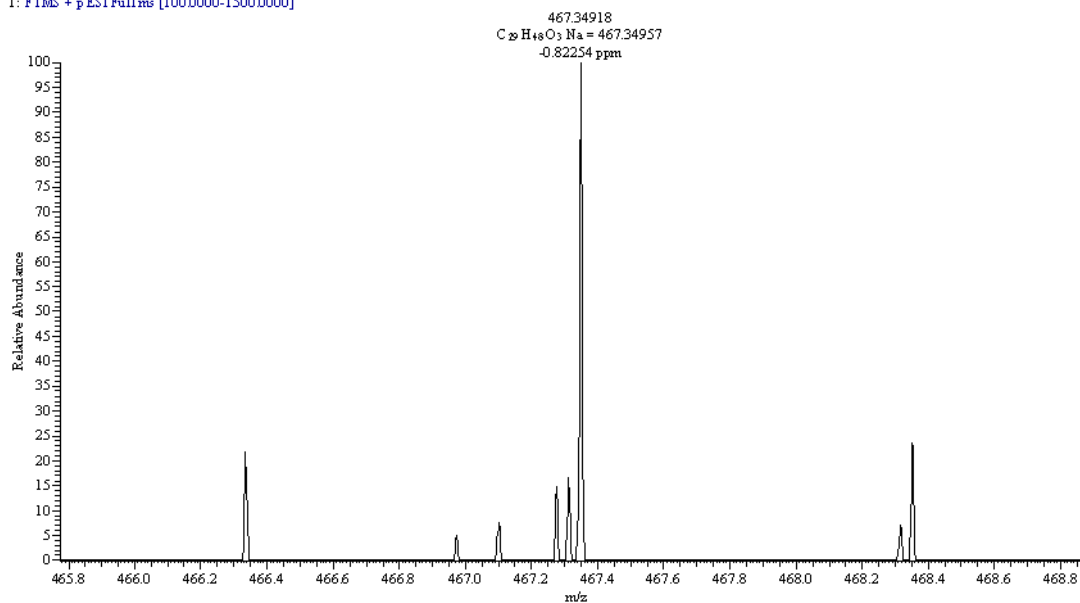

**Figure S27.** HRESIMS spectrum of compound **3**

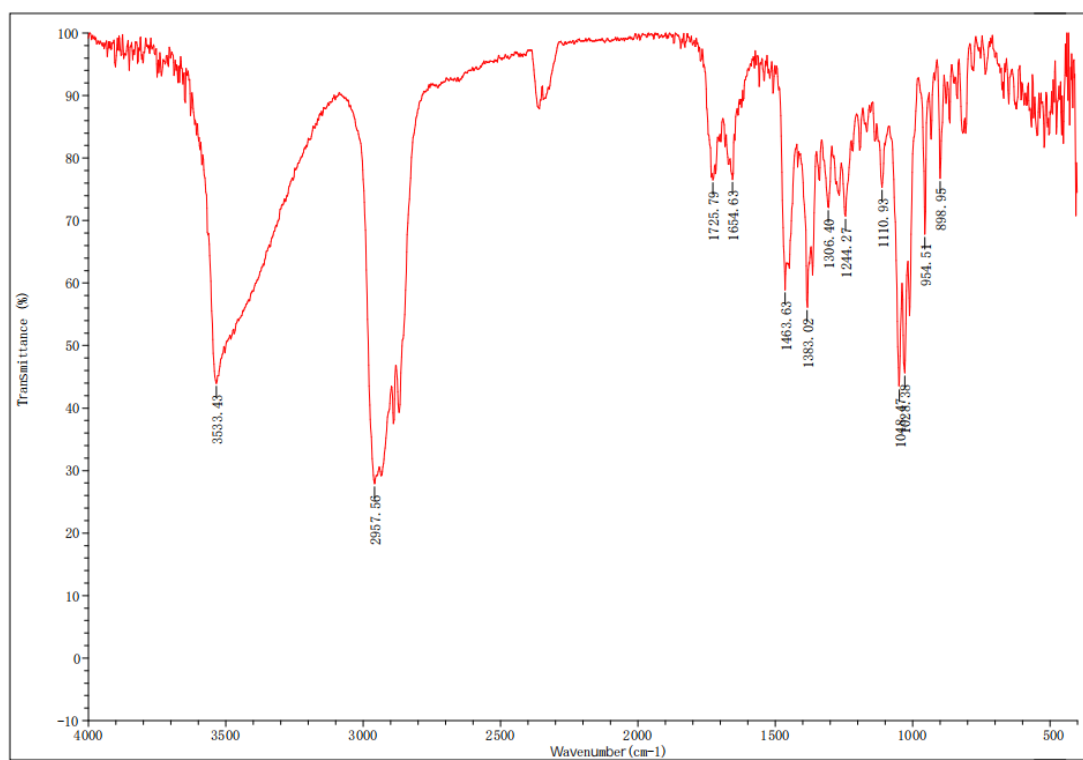

**Figure S28.** IR spectrum of compound **3**

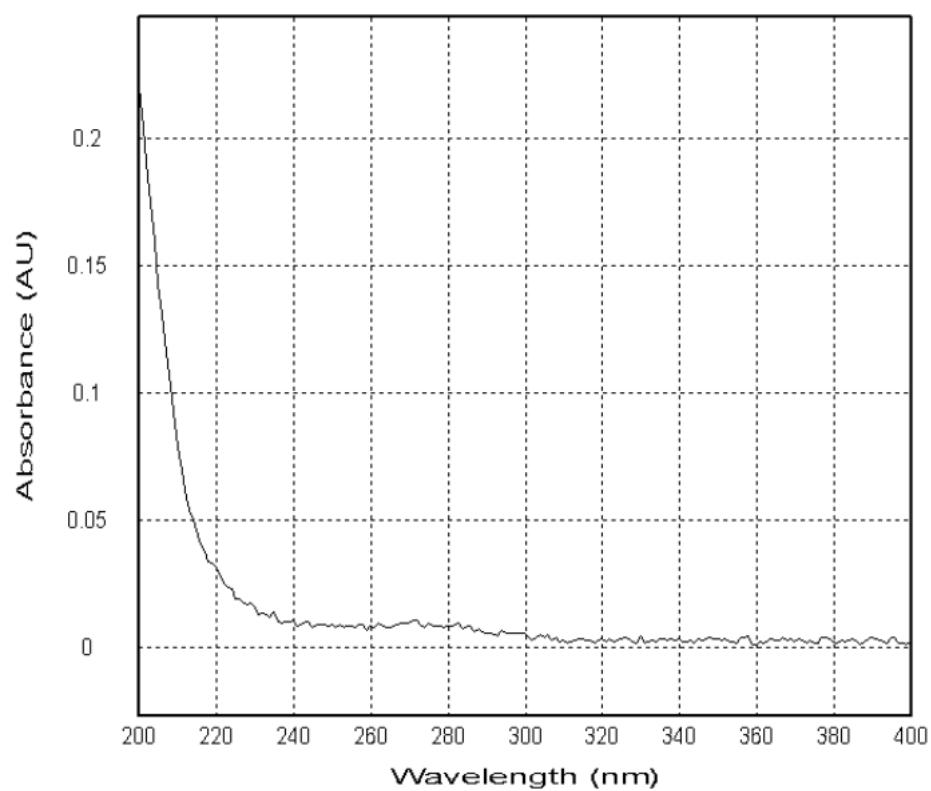

**Figure S29.** UV spectrum of compound **3**

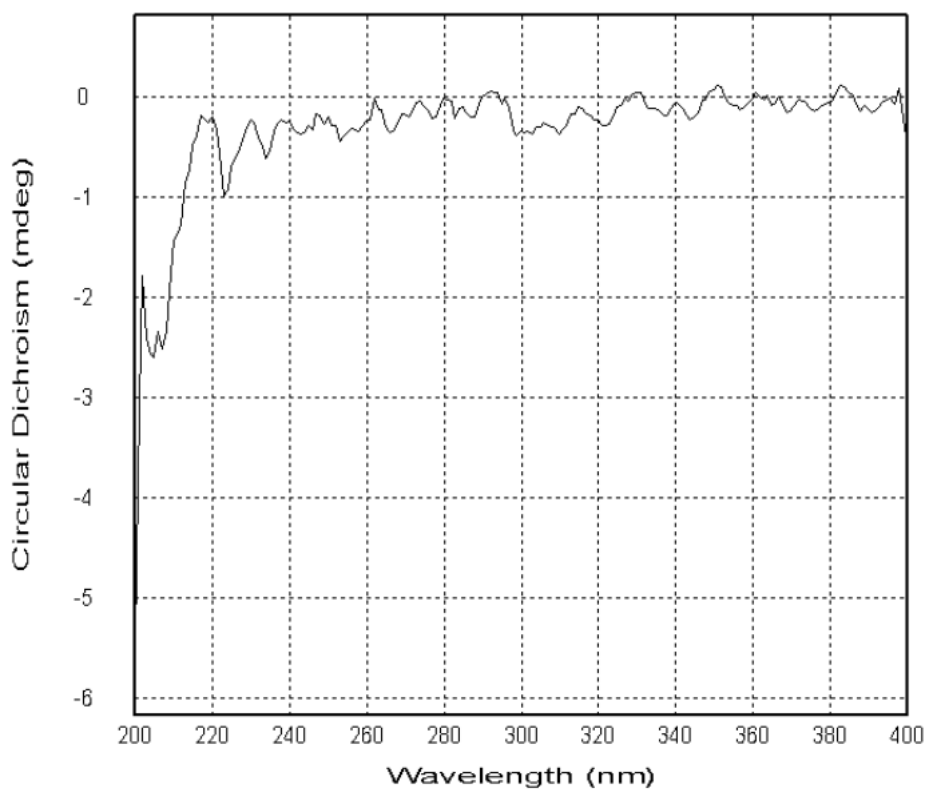

**Figure S30.** CD spectrum of compound **3**

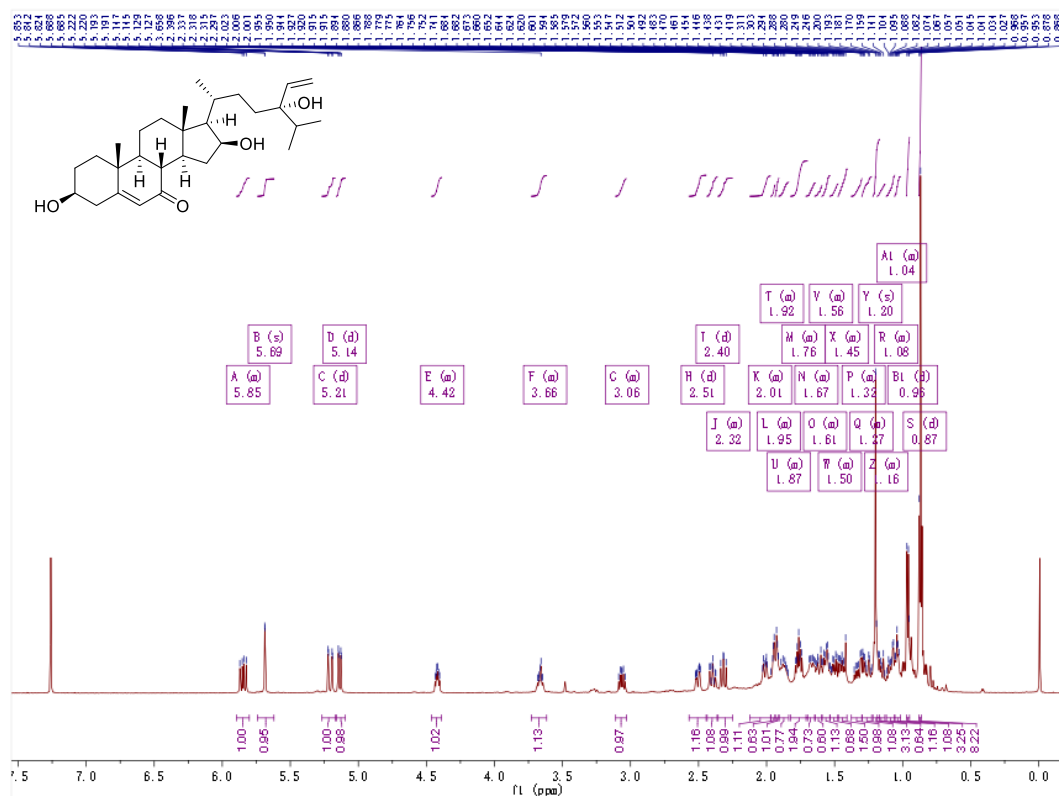

**Figure S31.** <sup>1</sup>H NMR spectrum of compound **4** in CDCl<sub>3</sub> (600 MHz)

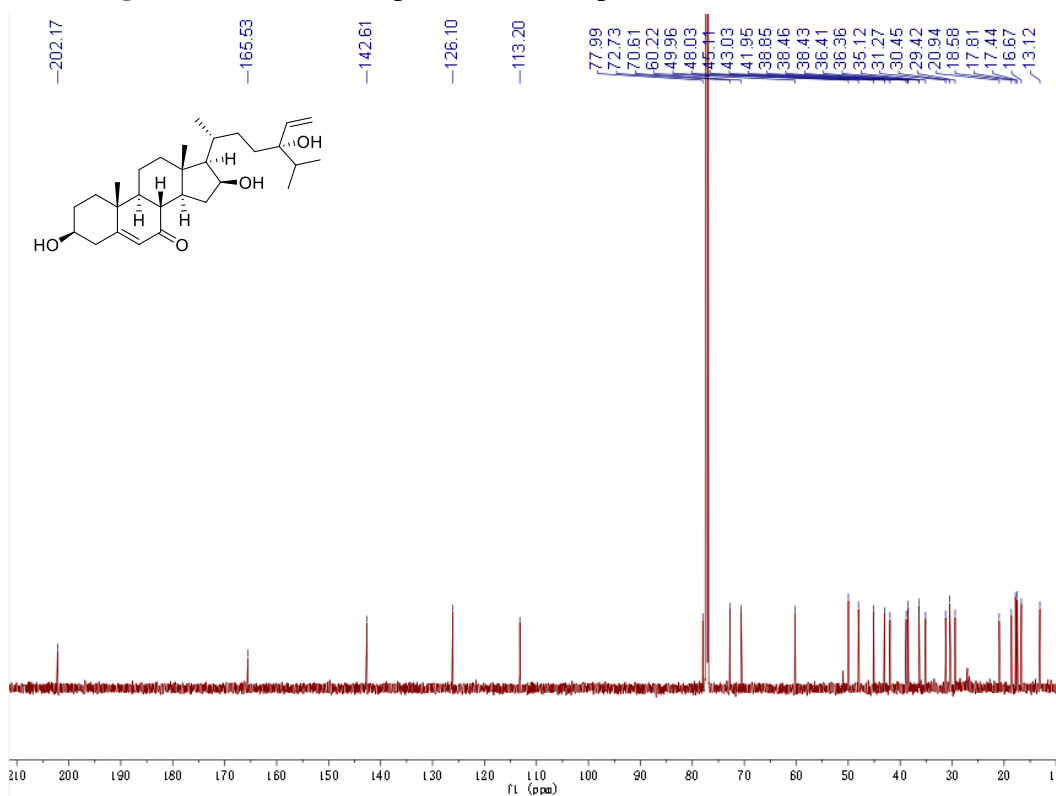

**Figure S32.** <sup>13</sup>C NMR spectrum of compound **4** in CDCl<sub>3</sub> (150 MHz)

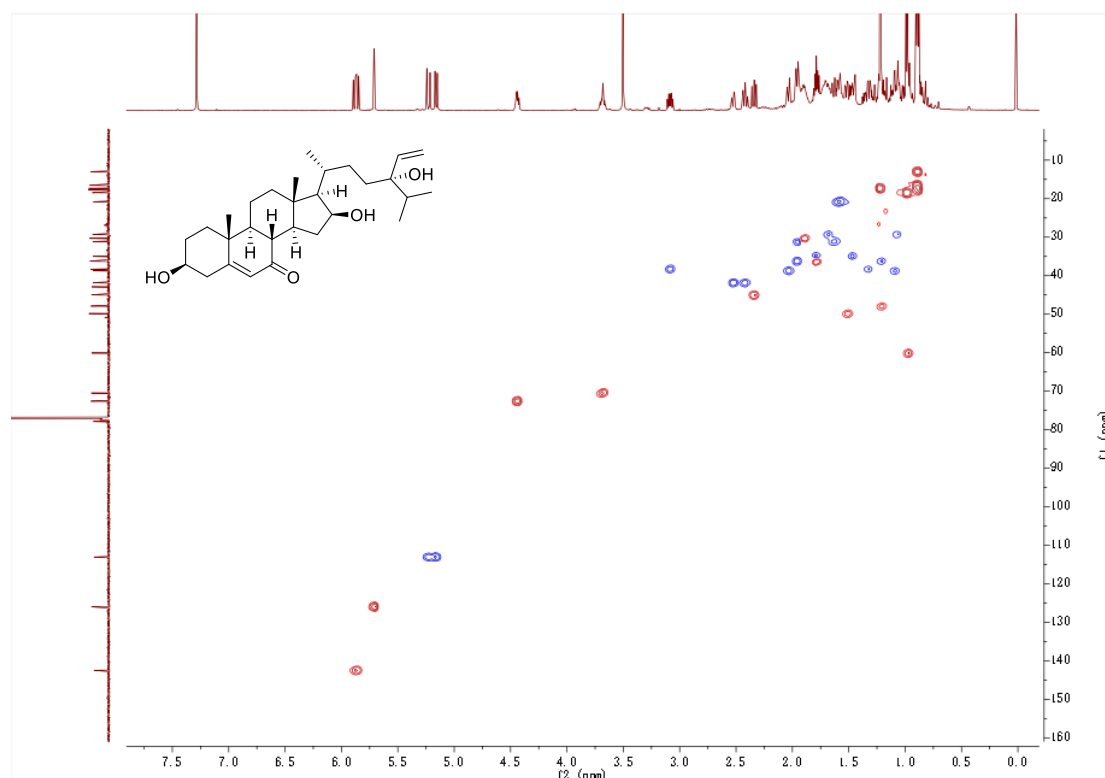

**Figure S33.** HSQC spectrum of compound **4** in  $\text{CDCl}_3$

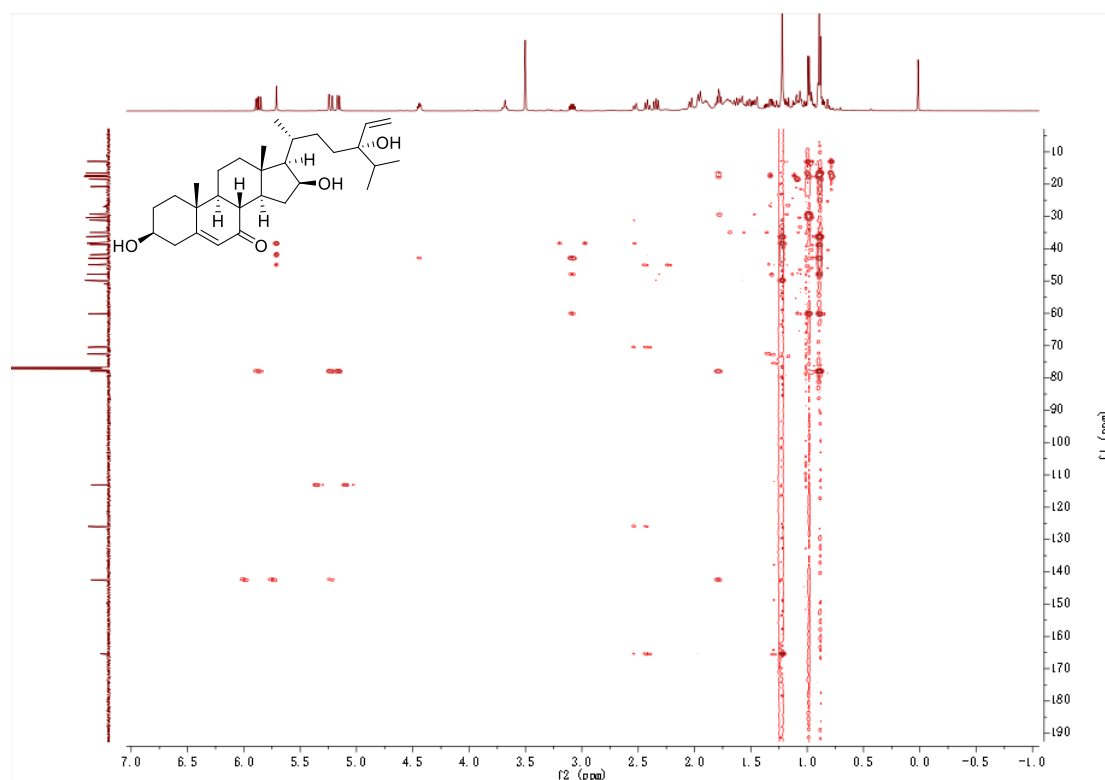

**Figure S34.** HMBC spectrum of compound **4** in  $\text{CDCl}_3$

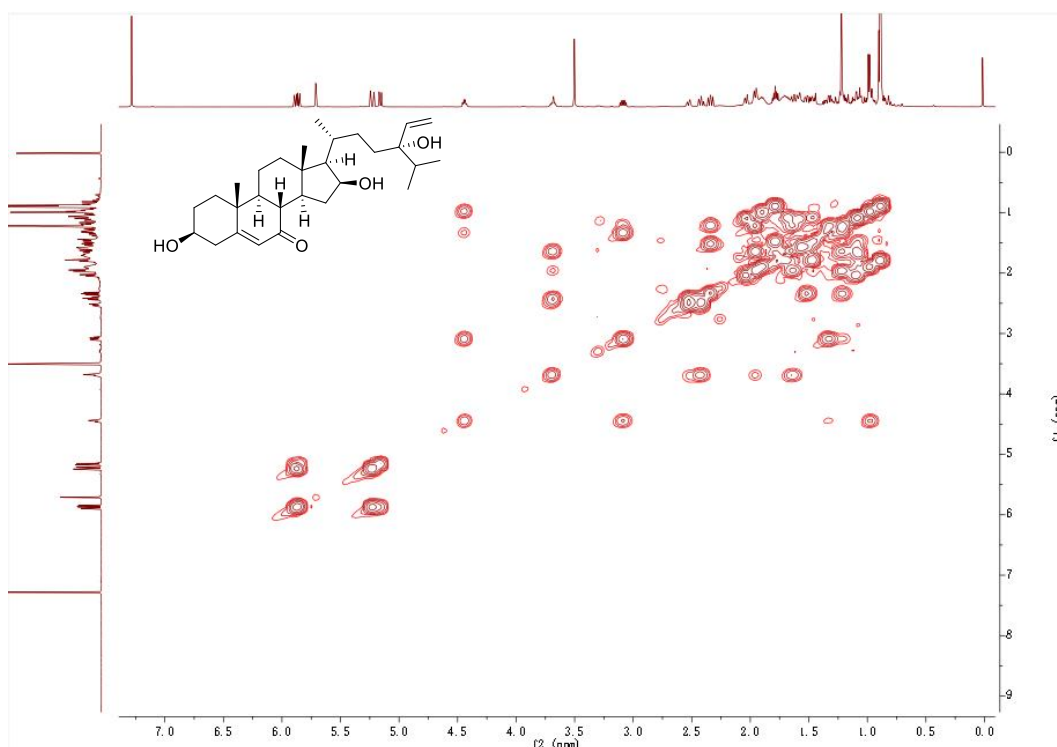

**Figure S35.**  $^1\text{H}$ - $^1\text{H}$  COSY spectrum of compound **4** in  $\text{CDCl}_3$

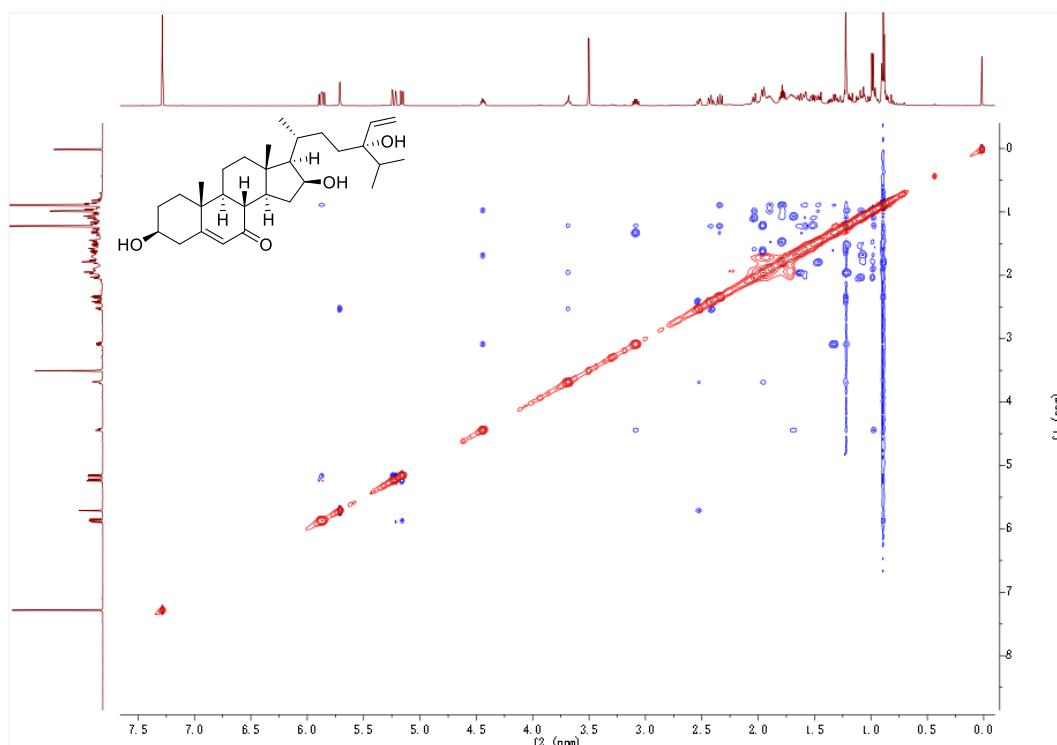

**Figure S36.** NOESY spectrum of compound **4** in  $\text{CDCl}_3$

T: FTMS + p ESI Fullms [100.0000-1500.0000]

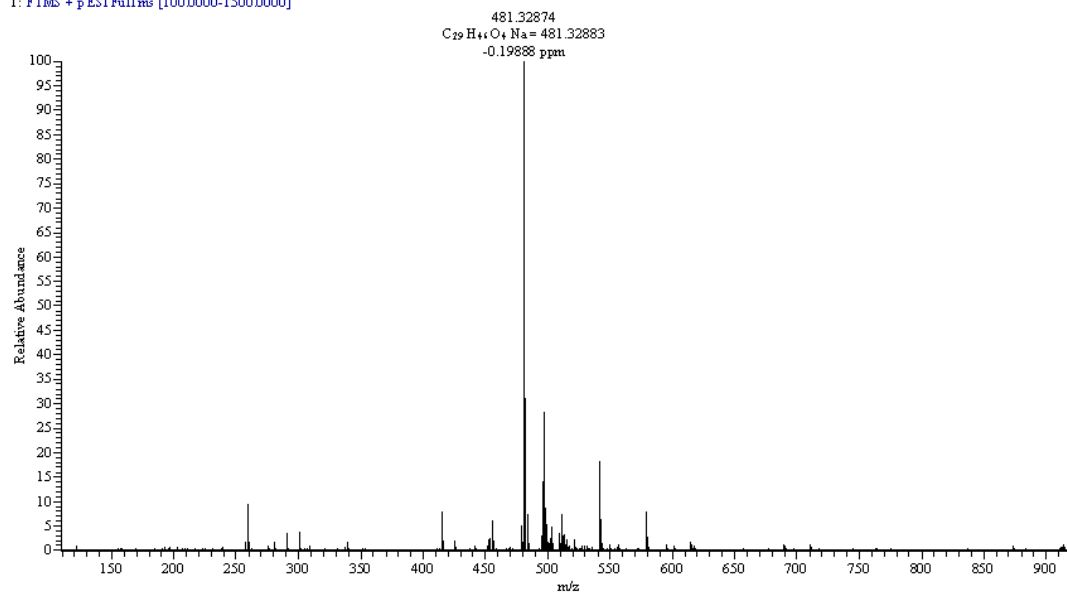

**Figure S37.** HRESIMS spectrum of compound **4**

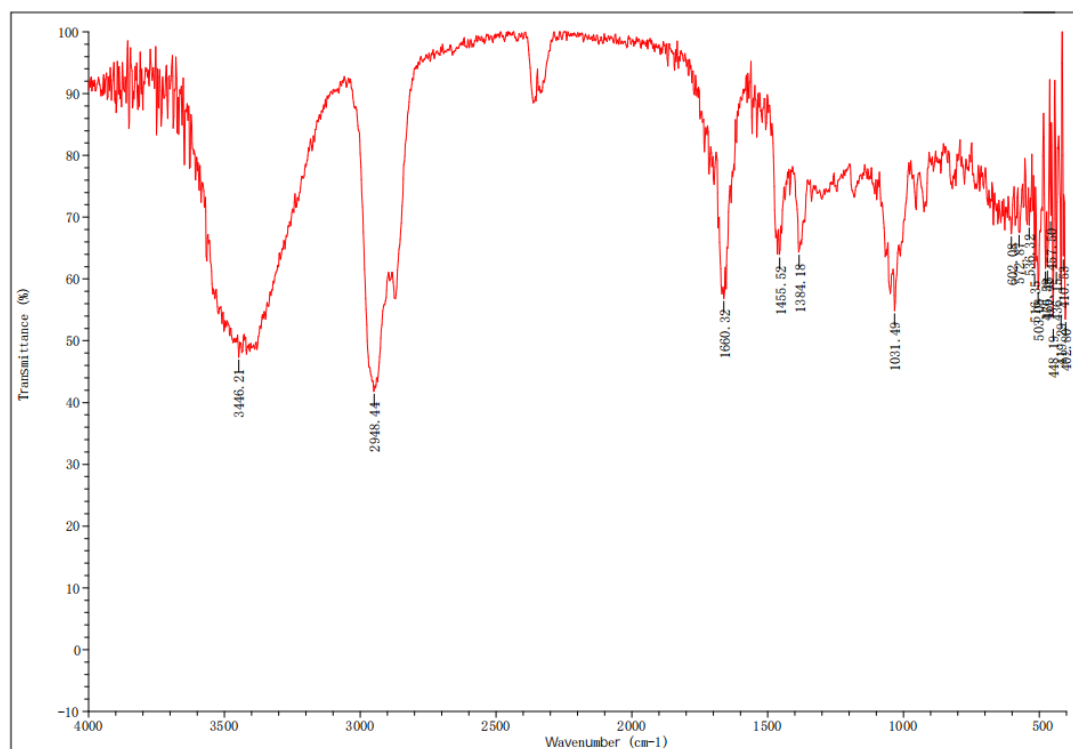

**Figure S38.** IR spectrum of compound **4**



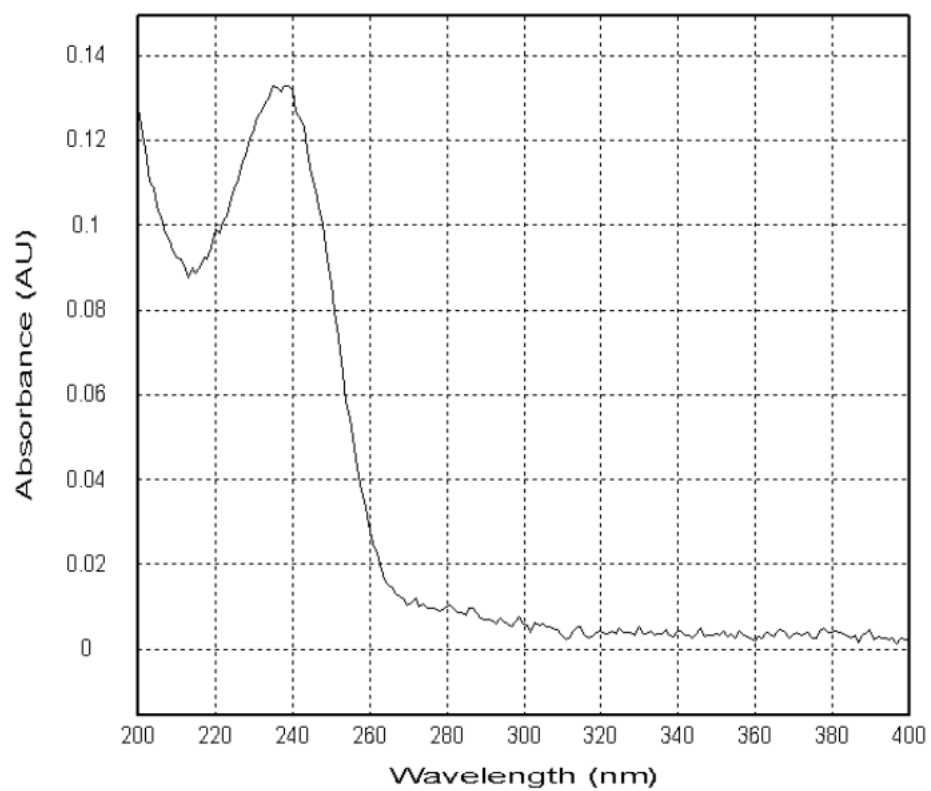

**Figure S39.** UV spectrum of compound **4**

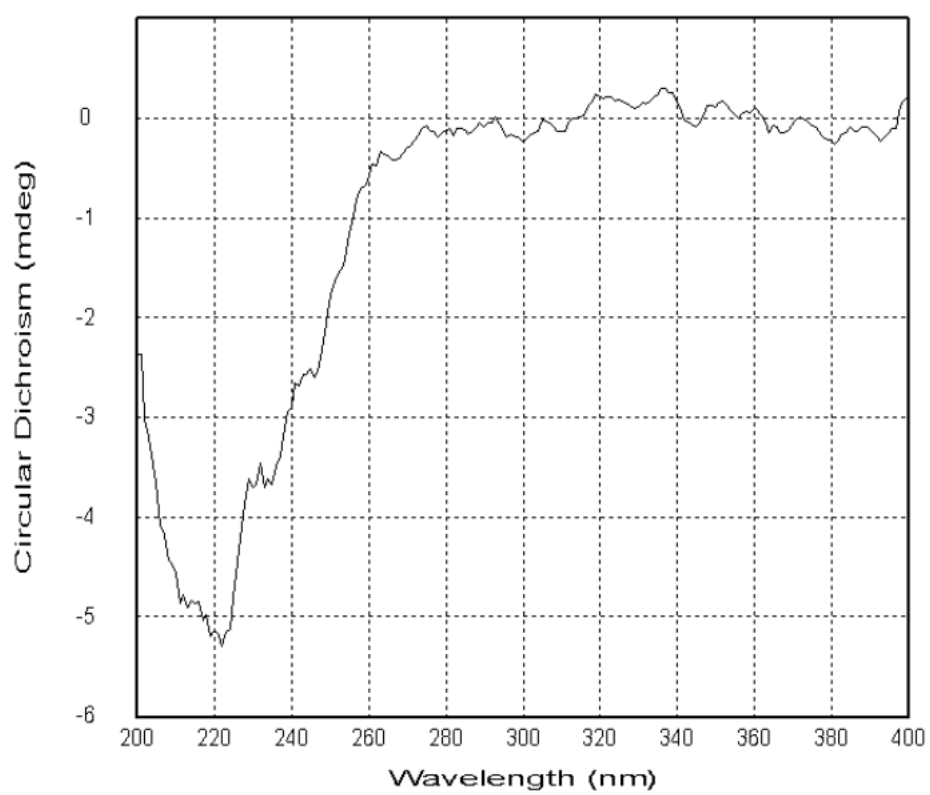

**Figure S40.** CD spectrum of compound **4**

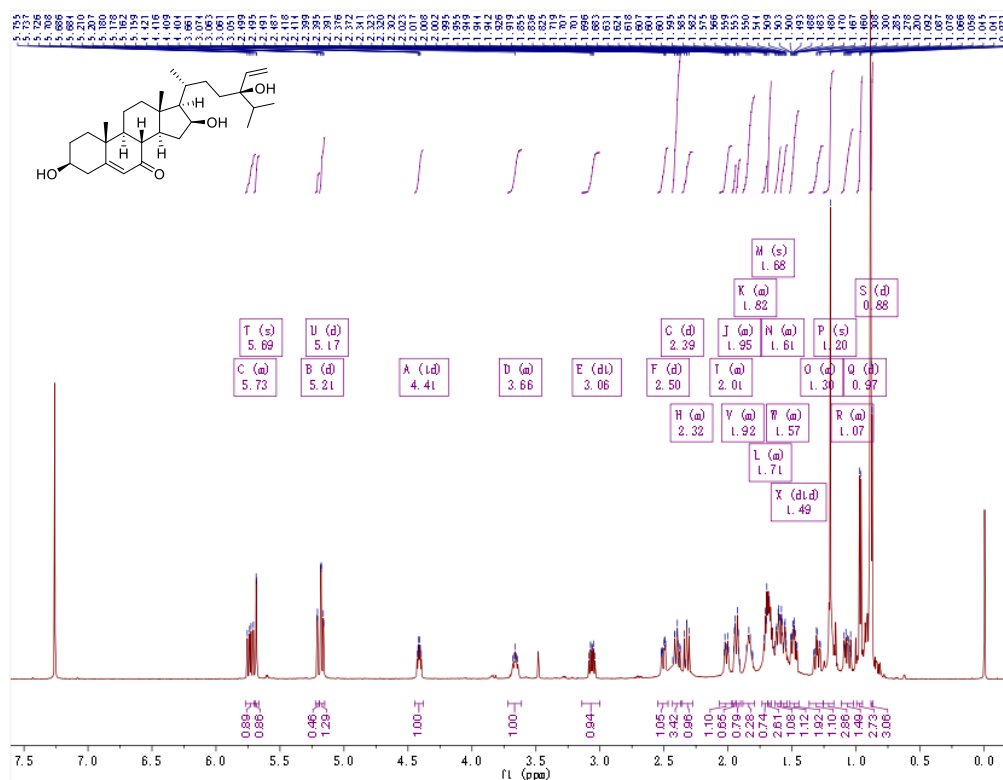

**Figure S41.** <sup>1</sup>H NMR spectrum of compound **5** in CDCl<sub>3</sub> (600 MHz)

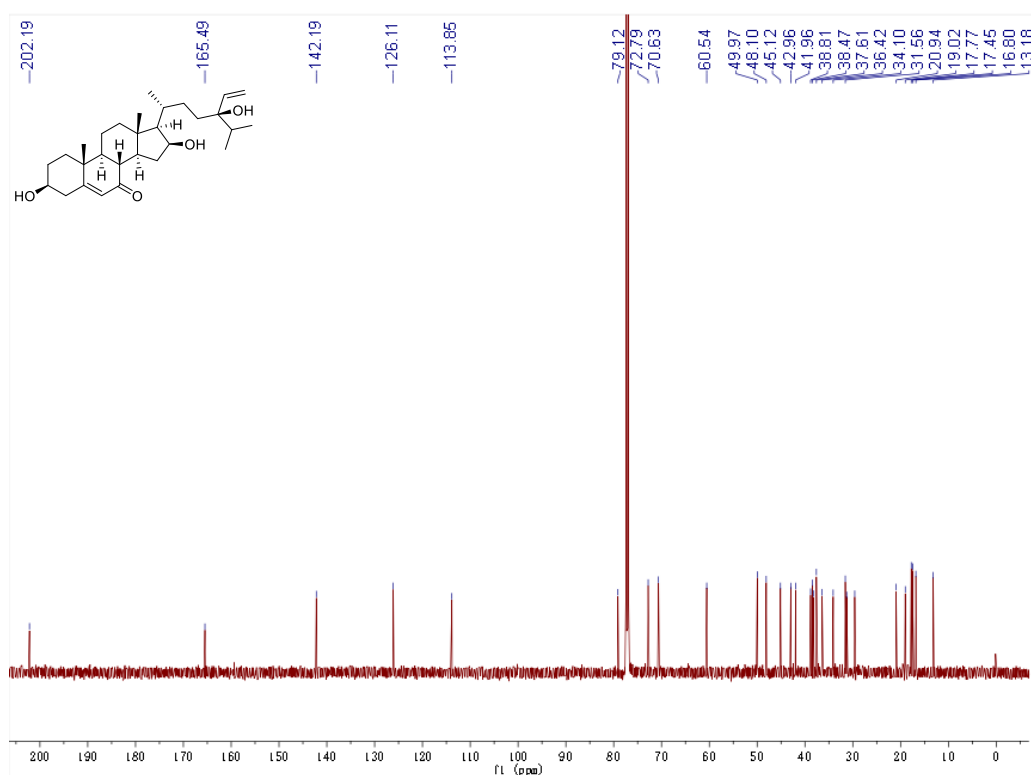

**Figure S42.** <sup>13</sup>C NMR spectrum of compound **5** in CDCl<sub>3</sub> (150 MHz)

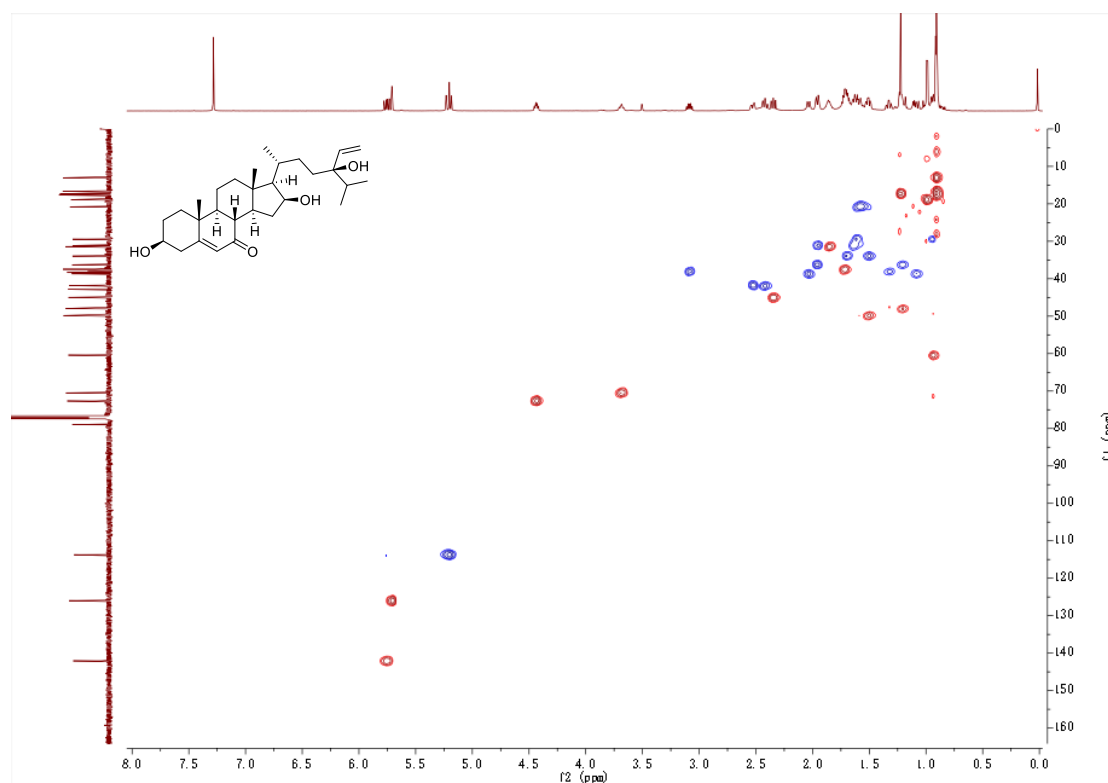

**Figure S43.** HSQC spectrum of compound **5** in  $\text{CDCl}_3$

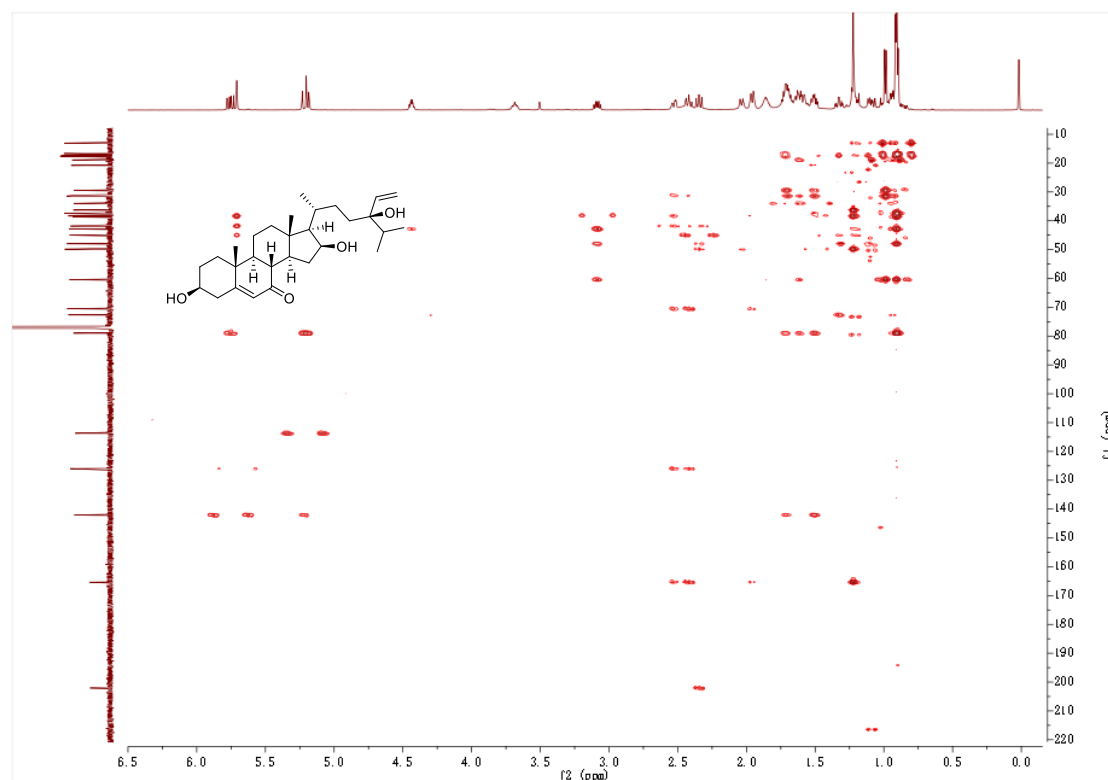

**Figure S44.** HMBC spectrum of compound **5** in  $\text{CDCl}_3$

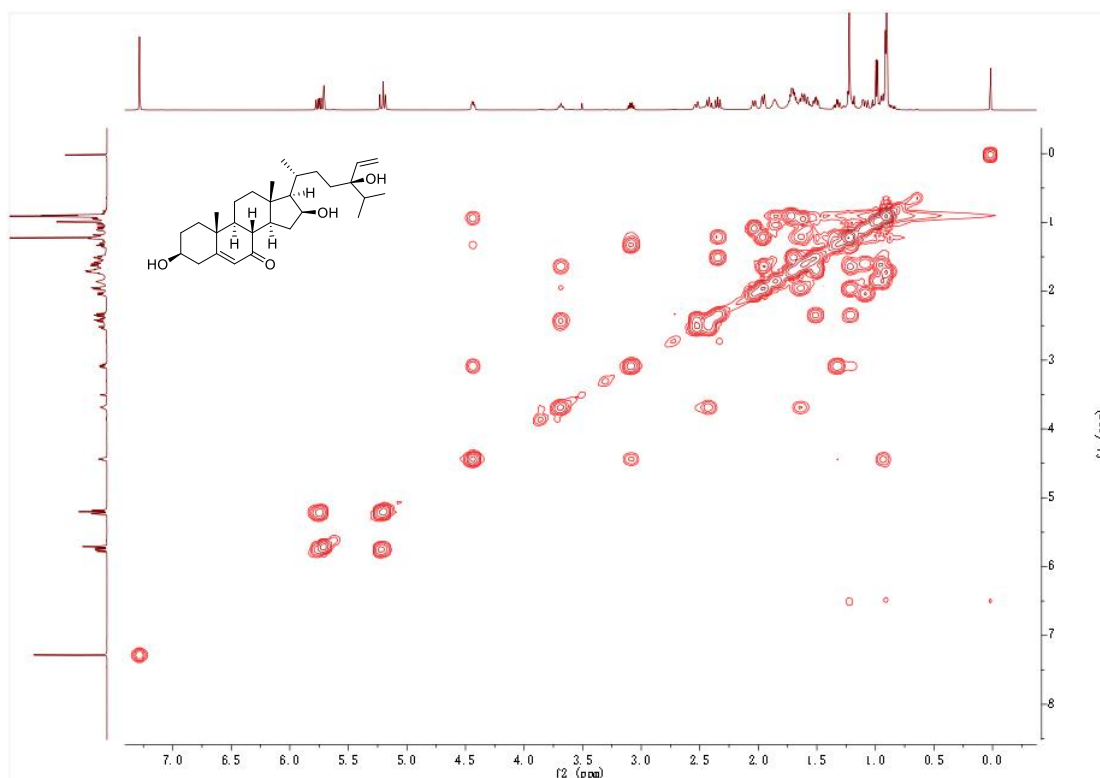

**Figure S45.**  $^1\text{H}$ - $^1\text{H}$  COSY spectrum of compound **5** in  $\text{CDCl}_3$

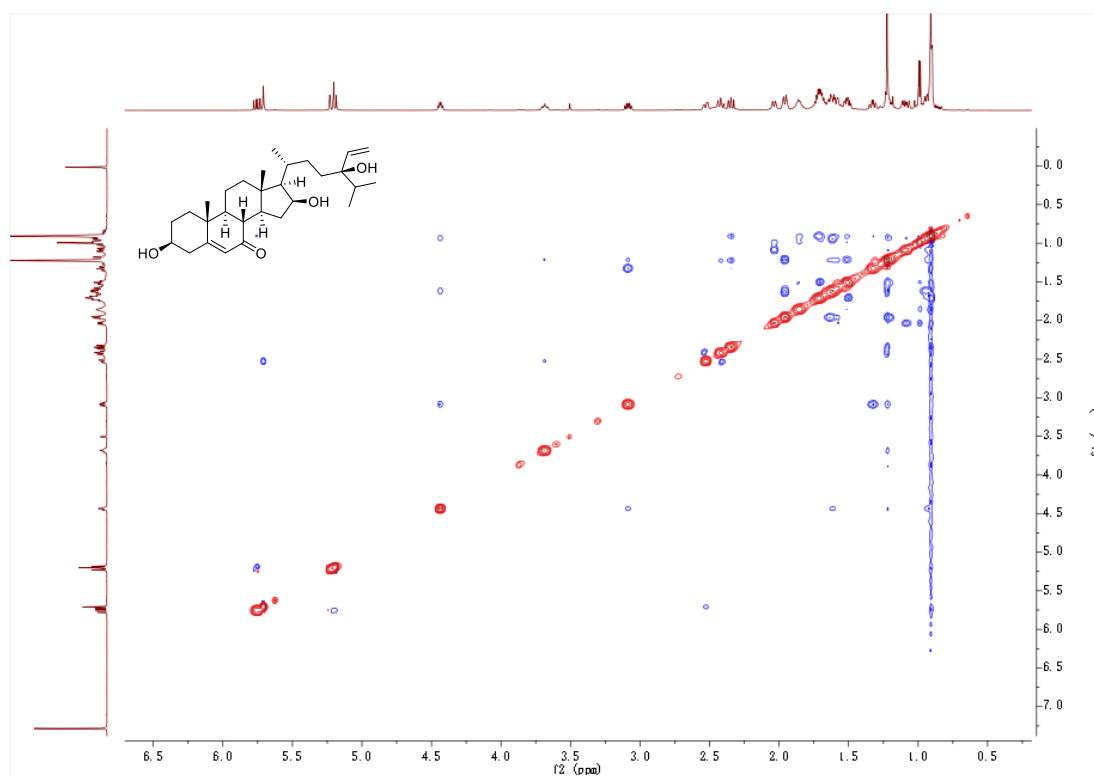

**Figure S46.** NOESY spectrum of compound **5** in  $\text{CDCl}_3$

T: FTMS + p ESI Full.ms [100.0000-1500.0000]

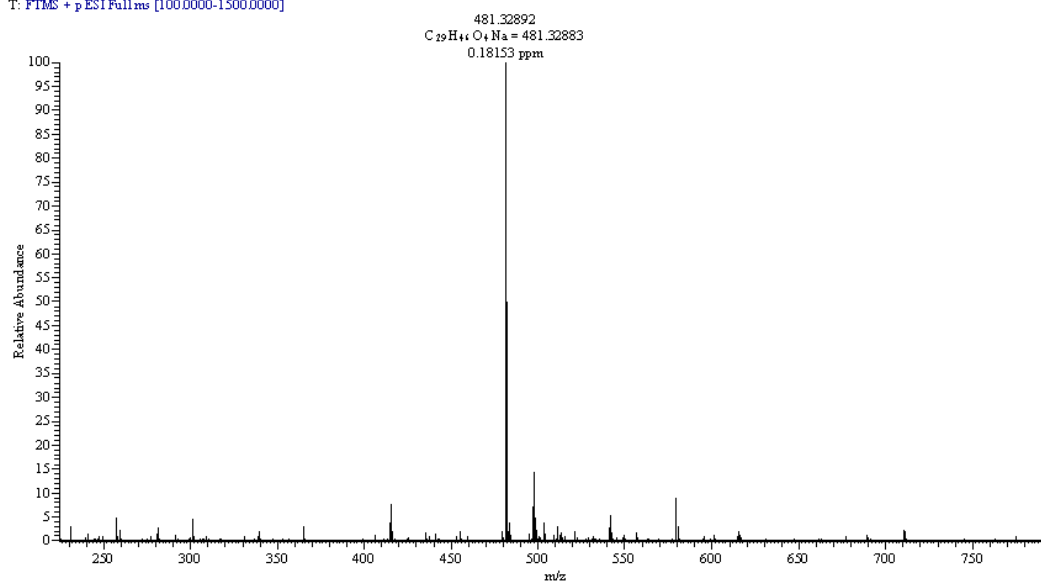

**Figure S47.** HRESIMS spectrum of compound **5**

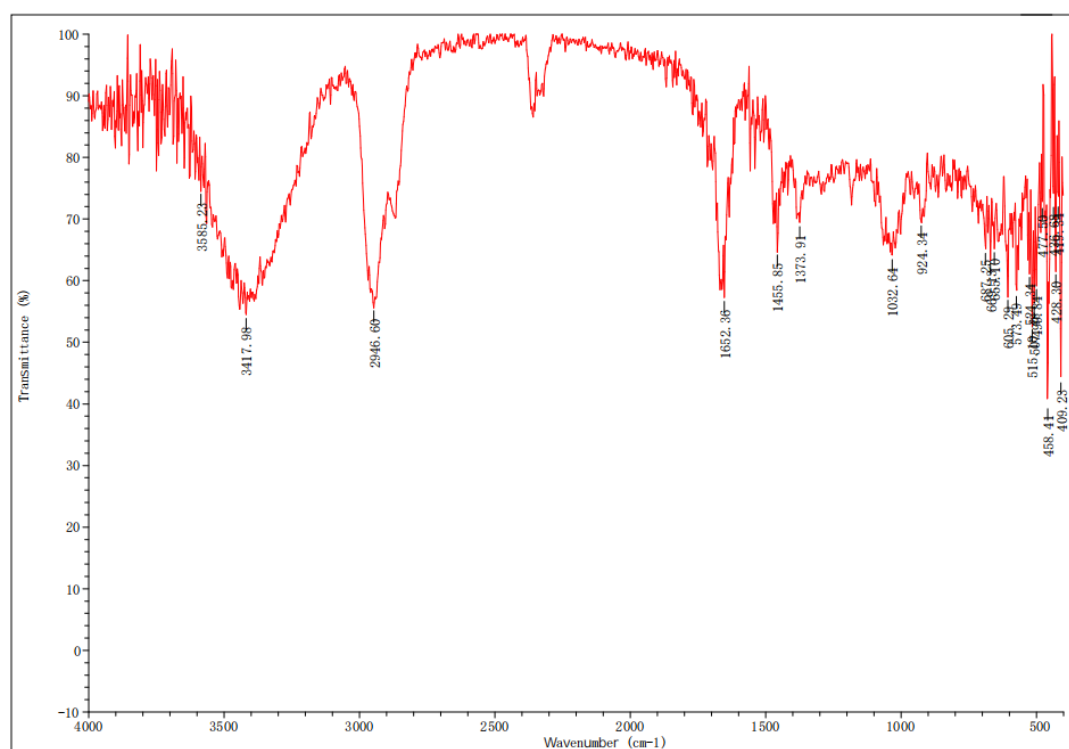

**Figure S48.** IR spectrum of compound **5**

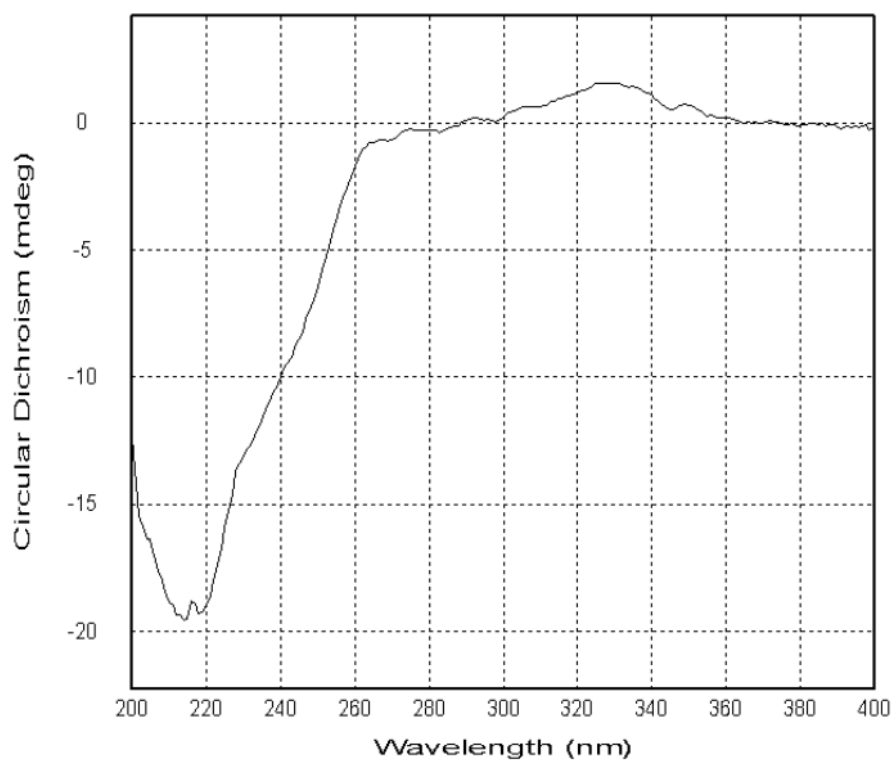

**Figure S49.** UV spectrum of compound **5**

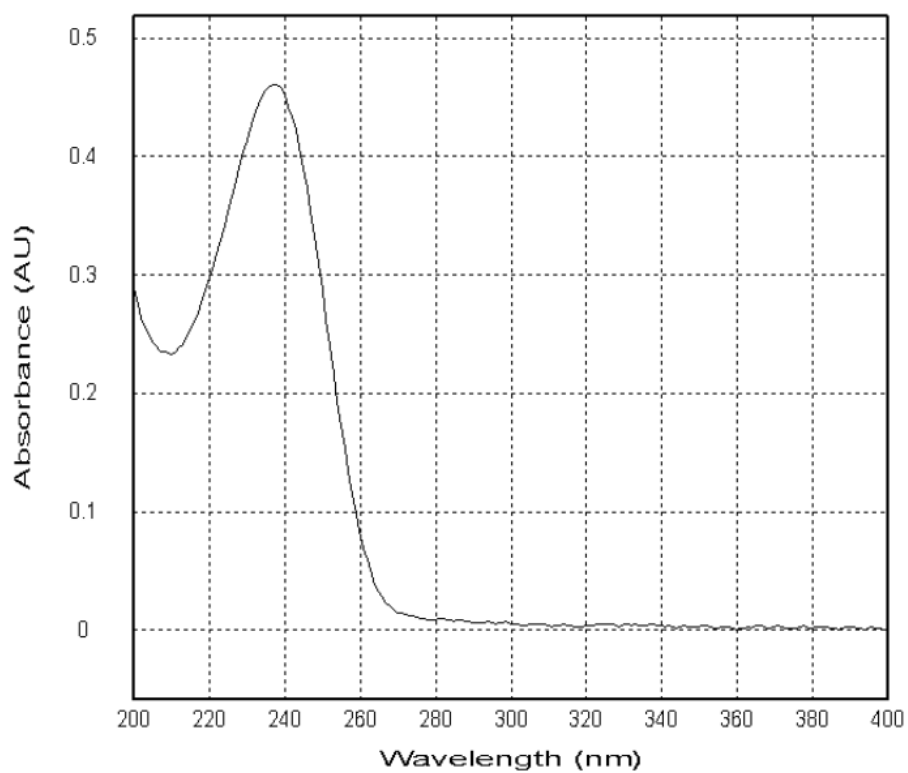

**Figure S50.** CD spectrum of compound **5**

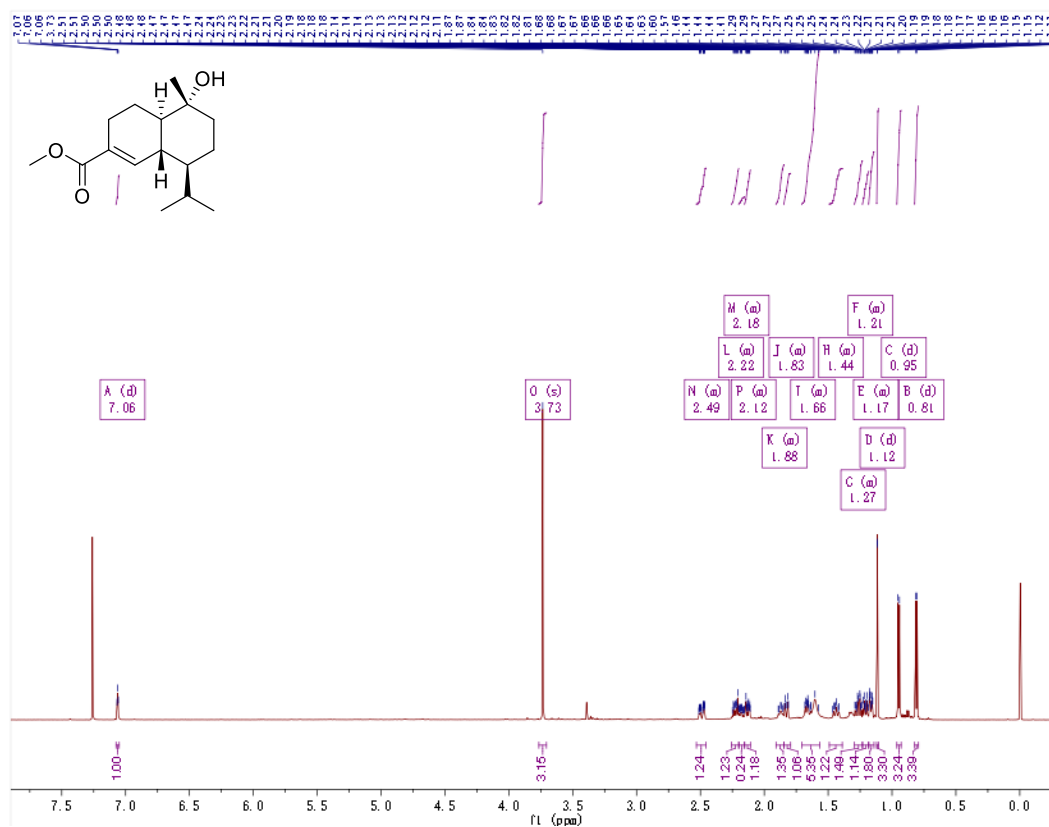

**Figure S51.**  $^1\text{H}$  NMR spectrum of compound **6** in  $\text{CDCl}_3$  (600 MHz)

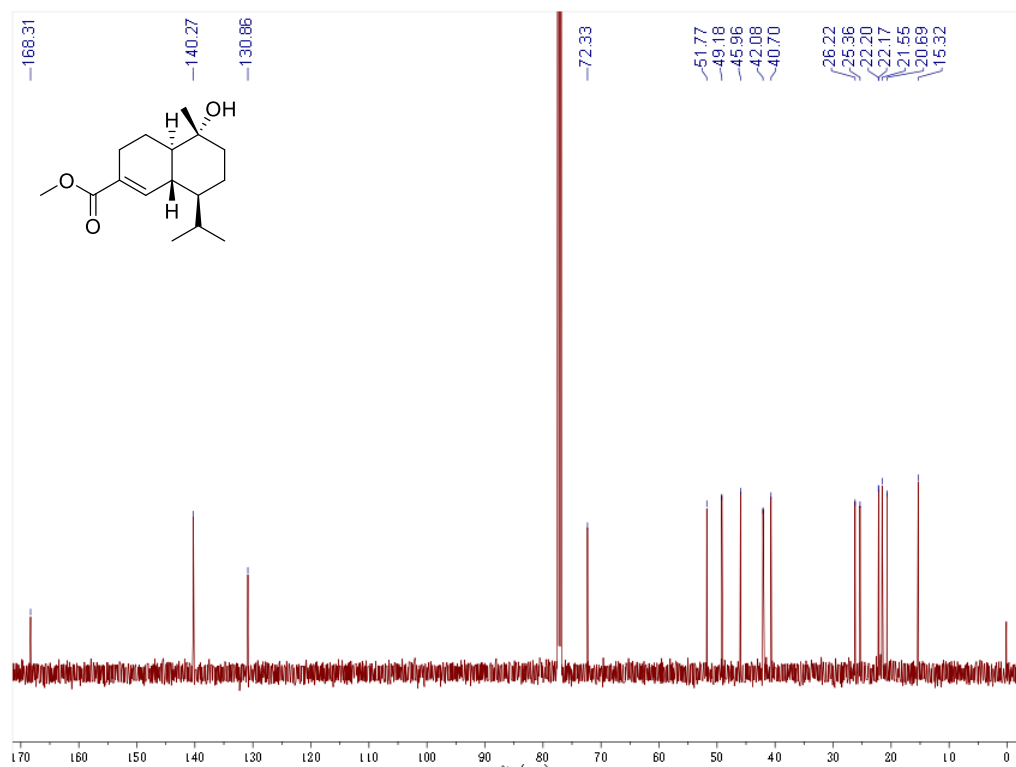

**Figure S52.**  $^{13}\text{C}$  NMR spectrum of compound **6** in  $\text{CDCl}_3$  (150 MHz)

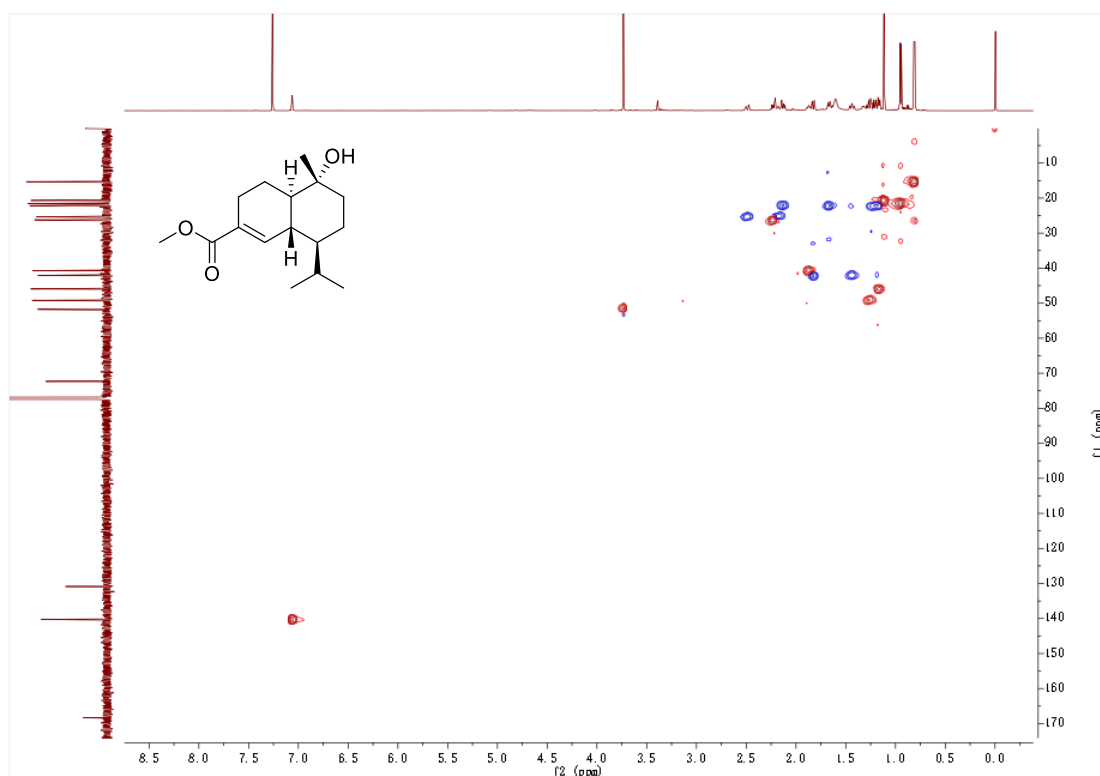

**Figure S53.** HSQC spectrum of compound **6** in CDCl<sub>3</sub>

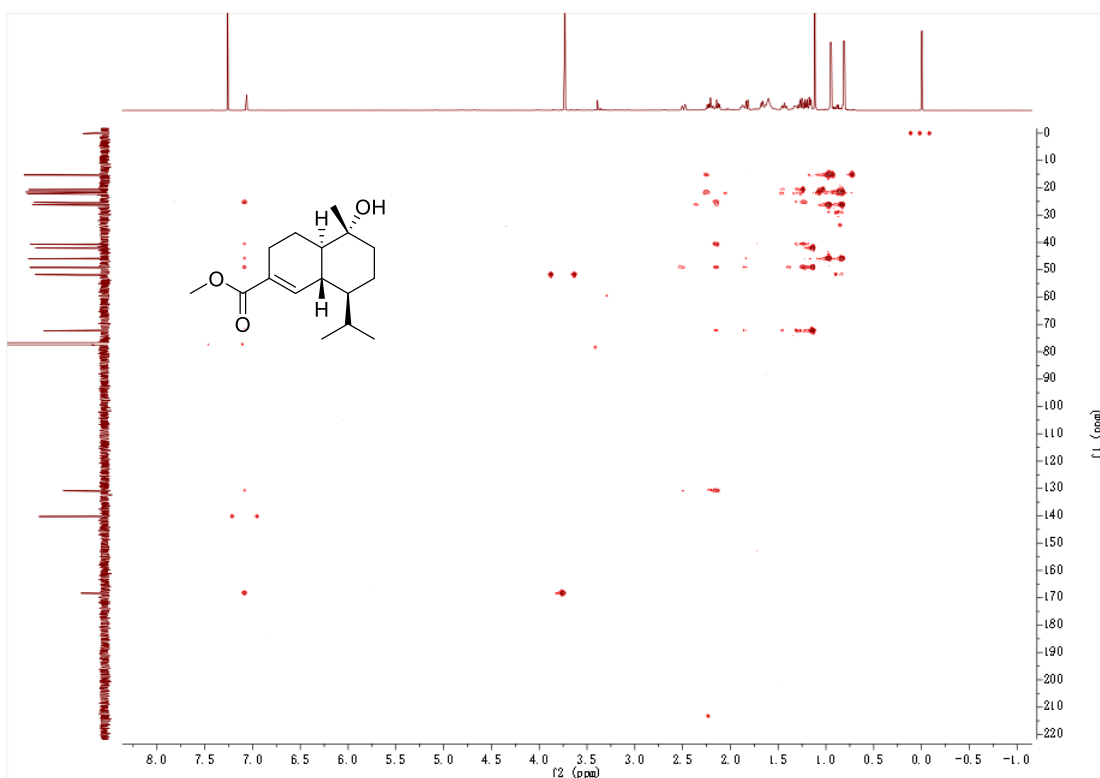

**Figure S54.** HMBC spectrum of compound **6** in CDCl<sub>3</sub>



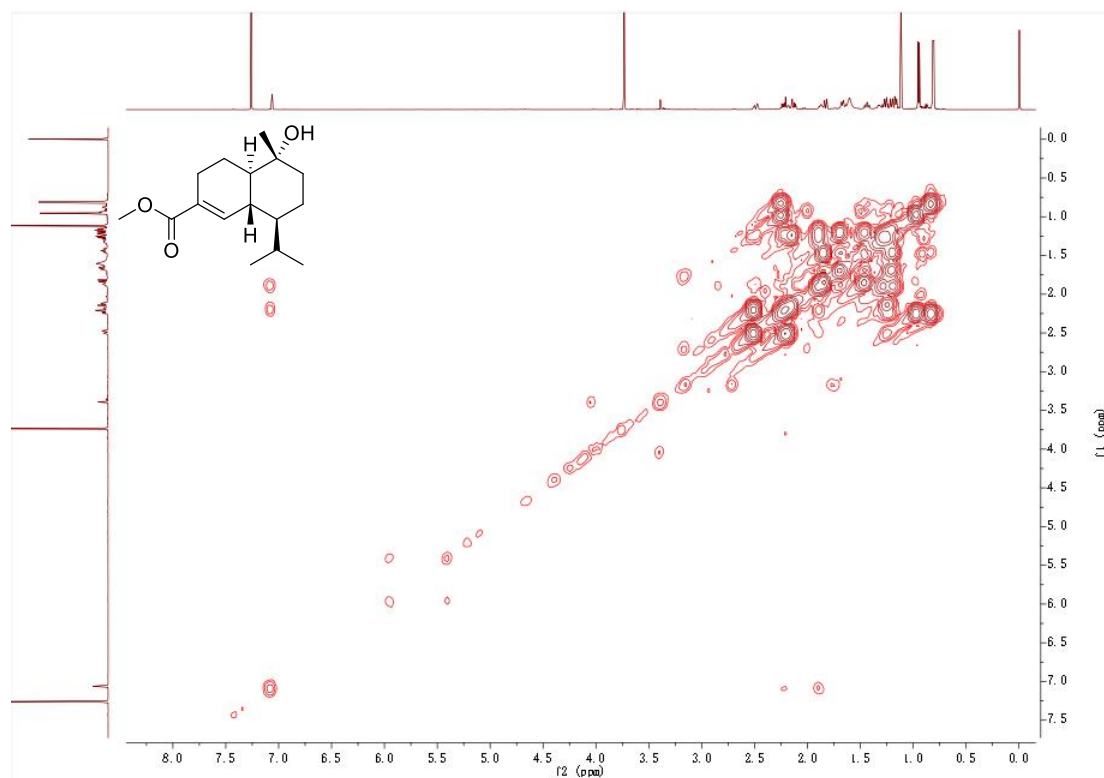

**Figure S55.**  $^1\text{H}$ - $^1\text{H}$  COSY spectrum of compound **6** in  $\text{CDCl}_3$

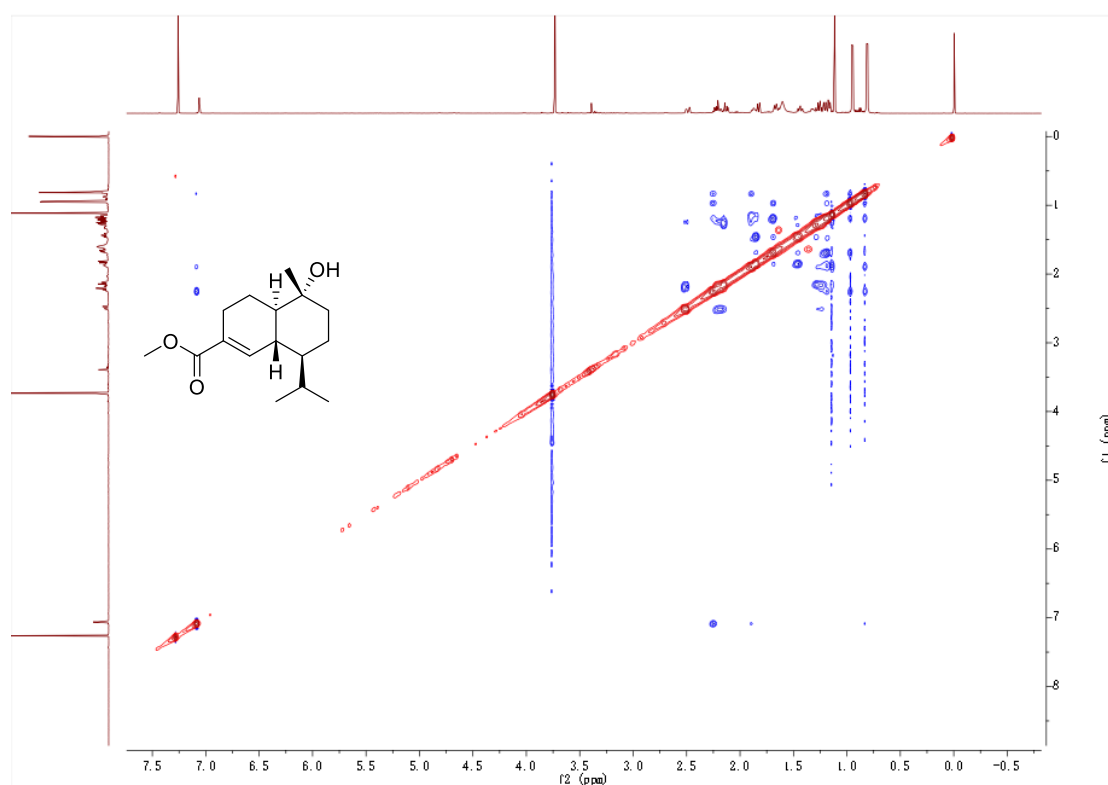

**Figure S56.** NOESY spectrum of compound **6** in  $\text{CDCl}_3$

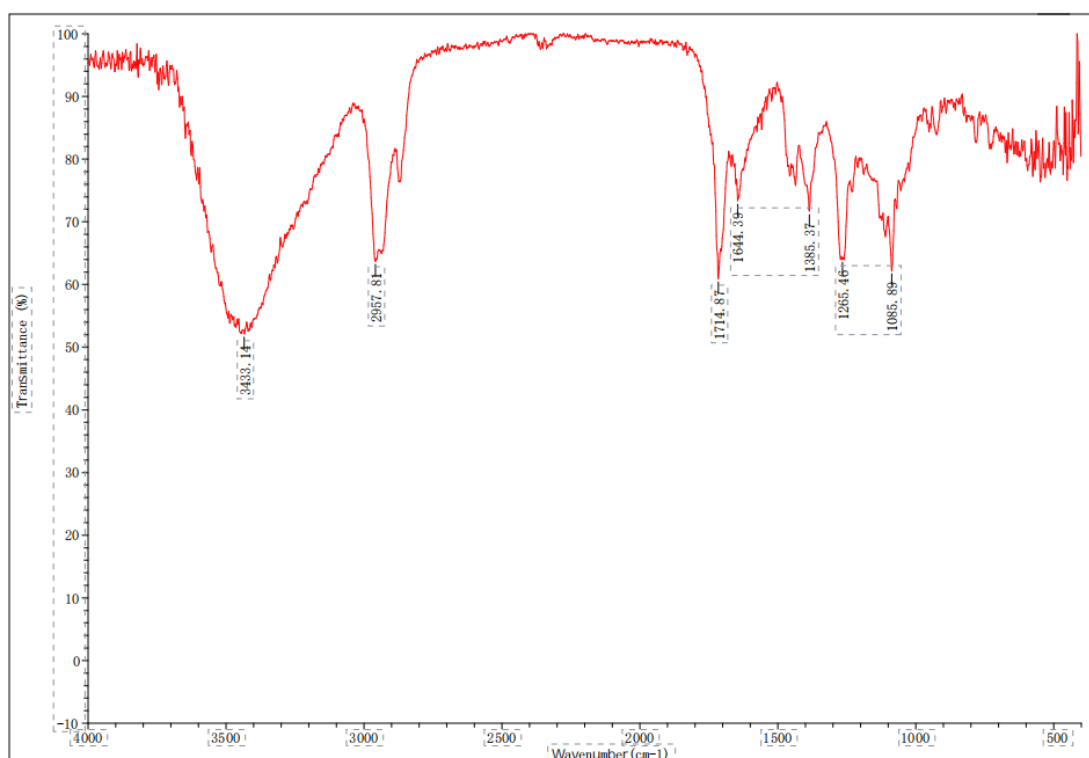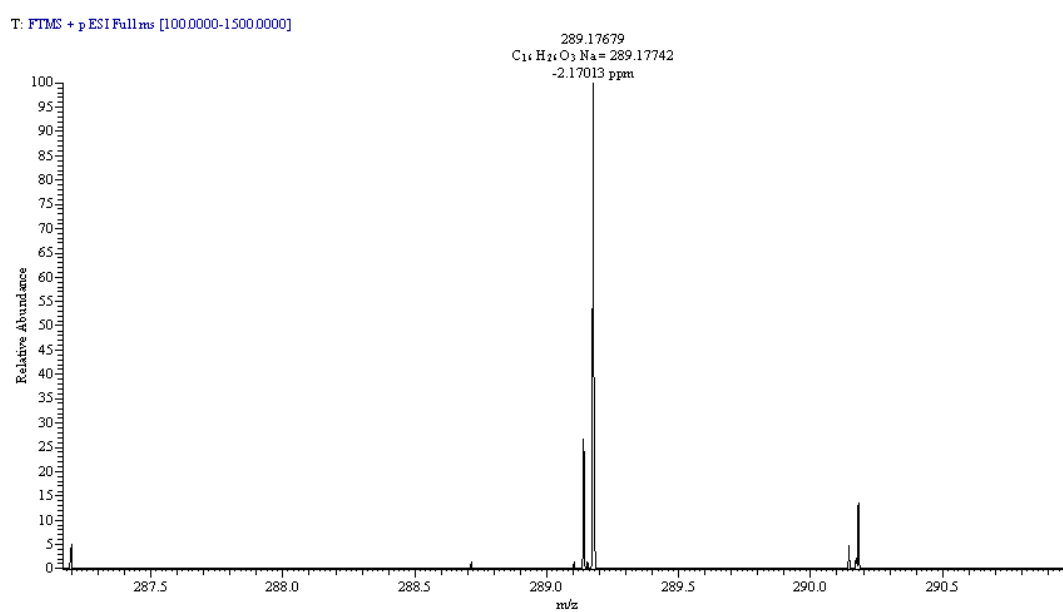

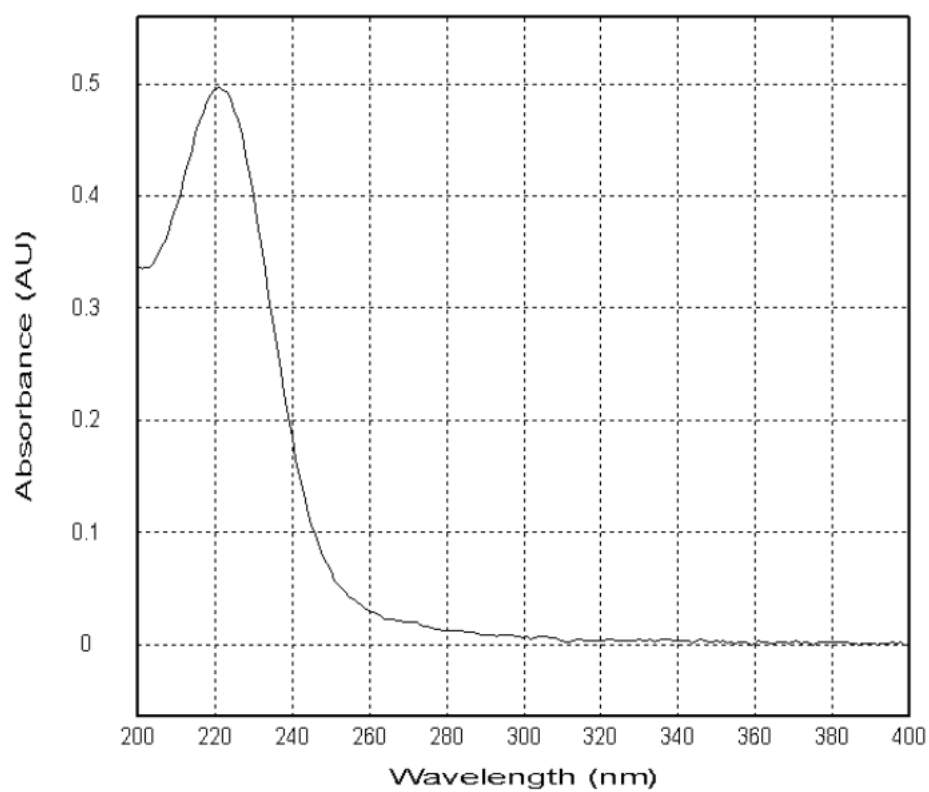

**Figure S59.** UV spectrum of compound **6**

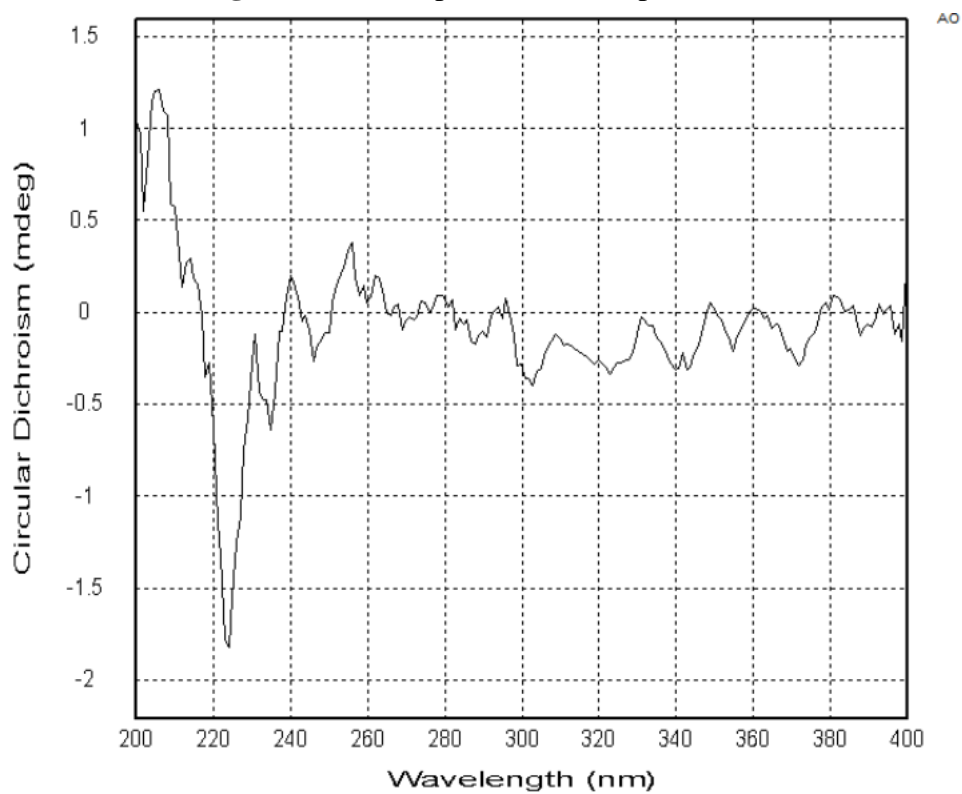

**Figure S60.** CD spectrum of compound **6**

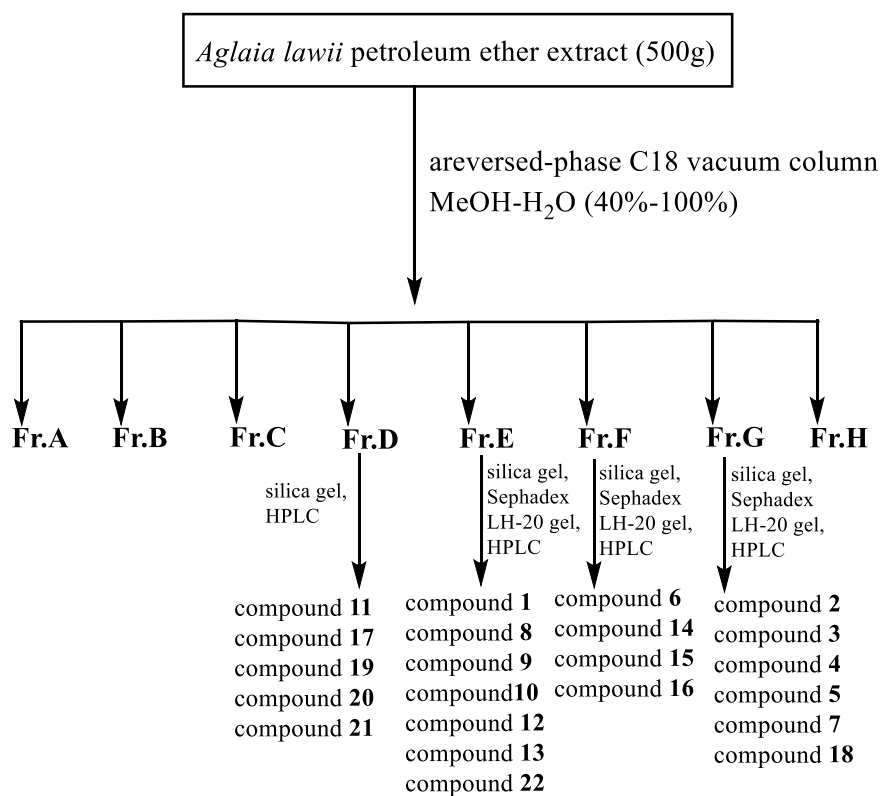

**Figure S61.** Compounds separation flowchart
